# Supplementary material for: Differences in sustained alterations in protein expression between livers of mice exposed to high-dose-rate and low-dose-rate radiation
Source: PubMed Central journal article supplement — J Radiat Res. 2017 Feb 15;58(4):421–9. doi: 10.1093/jrr/rrw133 (PMC5570048; doi:10.1093/jrr/rrw133), 2017-02-15
Supplement: supplementary_table1r.pdf [file supplementary_table1r.pdf]

Supplementary Table 1

|          |                                      | 8Gy (acute irradiation) |              |              | 4Gy(acute irradiation) |              |              |
|----------|--------------------------------------|-------------------------|--------------|--------------|------------------------|--------------|--------------|
|          |                                      | Net intensity ratio     |              |              | Net intensity ratio    |              |              |
| Sigma No | Name                                 | Comparison 1            | Comparison 2 | Comparison 3 | Comparison 1           | Comparison 2 | Comparison 3 |
| T5942    | 14 3 3                               | 1.60                    | 1.91         | 1.86         | 1.56                   | 1.78         | 1.46         |
| A5463    | Acetylated Protein                   | 0.75                    | 0.81         | 0.69         | 0.68                   | 0.69         | 0.68         |
| A5060    | Actin                                | 0.97                    | 1.01         | 0.89         | 0.94                   | 1.36         | 1.29         |
| A3853    | Actin                                | 1.11                    | 1.20         | 0.70         | 0.51                   | 0.69         | 0.77         |
| A5228    | Actin a-Smooth Muscle                | 1.03                    | 1.11         | 1.07         | 0.93                   | 0.86         | 0.88         |
| A1978    | bActin                               | 1.35                    | 1.31         | 1.05         | 0.92                   | 0.84         | 0.83         |
| A2228    | bActin                               | 1.04                    | 1.06         | 0.96         | 0.80                   | 0.86         | 1.04         |
| A5044    | aActinin                             | 0.62                    | 0.61         | 0.56         | 0.56                   | 0.58         | 0.60         |
| A1226    | Actopaxin                            | 0.99                    | 0.94         | 0.87         | 0.86                   | 0.92         | 0.86         |
| A7107    | AP2                                  | 0.86                    | 0.94         | 1.07         | 0.70                   | 0.81         | 0.88         |
| A4450    | b1 and b2 Adaptins                   | 0.78                    | 0.88         | 0.66         | 0.71                   | 0.80         | 0.78         |
| A0349    | IAfadin                              | 0.70                    | 0.70         | 0.67         | 0.71                   | 0.82         | 0.80         |
| A8975    | AFX                                  | 0.78                    | 0.85         | 0.72         | 0.71                   | 0.87         | 0.84         |
| A5854    | AFX                                  | 0.91                    | 1.00         | 0.93         | 0.87                   | 1.13         | 1.09         |
| A6229    | AKR1C3                               | 0.85                    | 0.99         | 0.91         | 0.95                   | 1.05         | 1.03         |
| A9979    | Aly                                  | 0.98                    | 1.05         | 1.06         | 0.84                   | 1.15         | 1.09         |
| A8354    | bAmyloid                             | 0.99                    | 1.12         | 1.33         | 1.21                   | 1.38         | 1.26         |
| A8717    | Amyloid Precursor Protein            | 0.92                    | 0.93         | 0.85         | 0.92                   | 1.14         | 1.04         |
| A8967    | Amyloid Precursor Protein            | 0.97                    | 1.07         | 0.95         | 1.00                   | 1.17         | 1.02         |
| A8842    | Amyloid Precursor Protein KPI Domain | 1.11                    | 1.18         | 1.04         | 1.02                   | 1.07         | 1.01         |
| A9853    | Androgen Receptor                    | 0.85                    | 0.93         | 0.68         | 0.16                   | 0.68         | 0.73         |
| A8604    | Annexin V                            | 1.00                    | 1.04         | 1.26         | 1.12                   | 1.13         | 1.13         |
| A4475    | Annexin VII                          | 0.70                    | 0.81         | 0.74         | 0.85                   | 0.86         | 0.85         |
| C0992    | Anti CY3/5                           | 1.37                    | 1.07         | 0.53         | 0.52                   | 0.51         | 0.66         |
| A7674    | AOP1                                 | 0.83                    | 0.91         | 0.88         | 0.64                   | 0.60         | 0.58         |
| A5968    | AP1                                  | 0.68                    | 0.74         | 0.54         | 0.41                   | 0.45         | 0.54         |
| A0844    | AP2a                                 | 0.73                    | 0.79         | 0.62         | 0.55                   | 0.55         | 0.63         |
| A2105    | AP Endonuclease                      | 0.84                    | 0.88         | 0.69         | 0.33                   | 0.33         | 0.60         |
| A8469    | Apa1                                 | 0.67                    | 0.92         | 0.81         | 0.98                   | 1.08         | 1.04         |
| A7549    | Apoptosis Inducing Factor            | 0.86                    | 0.98         | 0.96         | 0.89                   | 0.81         | 0.86         |
| A1726    | APRIL                                | 0.90                    | 1.01         | 1.32         | 1.09                   | 1.13         | 1.18         |
| A1851    | APRIL                                | 1.34                    | 1.41         | 2.16         | 1.68                   | 1.53         | 1.29         |
| A8344    | ARC                                  | 0.68                    | 0.82         | 1.62         | 1.33                   | 0.92         | 1.18         |
| A4721    | ARNO                                 | 0.88                    | 0.98         | 0.87         | 0.72                   | 0.63         | 0.77         |
| A5601    | Arp1a Centractin                     | 0.87                    | 0.92         | 0.94         | 0.85                   | 0.85         | 0.84         |
| A6104    | ARP2                                 | 1.09                    | 1.11         | 1.28         | 1.09                   | 1.07         | 1.00         |
| A5979    | ARP3                                 | 1.51                    | 1.40         | 0.92         | 1.05                   | 1.18         | 1.09         |
| A3720    | ARTS                                 | 0.98                    | 0.98         | 0.88         | 0.89                   | 0.92         | 0.91         |
| A4471    | ARTS                                 | 1.05                    | 1.11         | 1.20         | 1.03                   | 1.21         | 1.12         |
| A4227    | ASAP1 Centaurin b4                   | 1.01                    | 1.00         | 0.92         | 0.92                   | 0.92         | 0.90         |
| A5355    | ASC2                                 | 0.88                    | 0.89         | 0.80         | 0.74                   | 0.77         | 0.83         |
| A4355    | ASPP1                                | 0.85                    | 0.96         | 0.75         | 0.74                   | 0.81         | 0.89         |
| A4480    | ASPP2                                | 1.00                    | 1.06         | 1.04         | 0.88                   | 0.95         | 1.05         |
| A7833    | ATF1                                 | 0.76                    | 0.81         | 0.74         | 0.70                   | 0.69         | 0.74         |
| A4086    | ATF2                                 | 0.80                    | 0.88         | 0.79         | 0.85                   | 0.82         | 0.83         |
| A4095    | ATF2 pThr69 71                       | 0.78                    | 0.85         | 0.90         | 0.90                   | 0.74         | 0.77         |
| A6093    | ATM                                  | 0.76                    | 0.83         | 0.85         | 0.74                   | 0.65         | 0.68         |
| A6218    | ATM                                  | 0.72                    | 0.69         | 0.58         | 0.29                   | 0.45         | 0.58         |
| A5102    | AuroraB                              | 0.88                    | 0.96         | 0.90         | 0.86                   | 0.87         | 0.86         |
| B0806    | BACE 1                               | 0.76                    | 0.75         | 0.64         | 0.51                   | 0.53         | 0.64         |
| B1310    | BACH1                                | 0.74                    | 0.72         | 0.44         | 0.09                   | 0.43         | 0.70         |
| B0559    | BAD                                  | 0.78                    | 0.67         | 0.53         | 0.77                   | 0.39         | 0.51         |
| B0436    | BAF57                                | 0.82                    | 0.86         | 0.91         | 0.53                   | 0.79         | 0.93         |
| B5897    | BAK                                  | 0.90                    | 0.96         | 0.89         | 0.86                   | 0.86         | 0.83         |
| B9303    | BAP1                                 | 0.81                    | 0.84         | 0.69         | 0.59                   | 0.61         | 0.66         |

|       |                            |      |      |      |      |      |      |
|-------|----------------------------|------|------|------|------|------|------|
| B3428 | Bax                        | 0.94 | 1.01 | 1.03 | 0.98 | 0.95 | 0.92 |
| B8429 | Bax                        | 0.98 | 1.08 | 1.17 | 0.90 | 0.95 | 0.96 |
| B8554 | Bax                        | 0.82 | 0.81 | 0.69 | 0.41 | 0.64 | 0.69 |
| B9054 | Bax                        | 0.80 | 0.79 | 0.81 | 0.66 | 0.79 | 0.83 |
| B7806 | Bcl10                      | 0.68 | 0.57 | 0.57 | 0.07 | 0.52 | 0.62 |
| P0110 | Prion protein              | 0.94 | 0.89 | 0.65 | 0.10 | 0.76 | 0.85 |
| B0431 | Bcl10                      | 0.82 | 0.95 | 0.82 | 0.74 | 0.90 | 0.85 |
| S4697 | Seladin                    | 1.00 | 1.11 | 1.30 | 1.13 | 1.32 | 1.17 |
| B9804 | Bcl2                       | 0.84 | 0.96 | 1.15 | 0.75 | 1.07 | 1.11 |
| B3170 | Bcl2                       | 0.86 | 0.79 | 1.42 | 1.00 | 0.14 | 0.60 |
| B9304 | Bclx                       | 0.77 | 0.87 | 0.68 | 0.70 | 0.73 | 0.74 |
| B9429 | BclxL                      | 0.43 | 0.44 | 0.46 | 0.39 | 0.30 | 0.32 |
| B4305 | BID                        | 0.78 | 0.82 | 0.70 | 0.66 | 0.69 | 0.76 |
| B3183 | BID                        | 0.54 | 0.43 | 0.51 | 1.03 | 0.71 | 0.78 |
| B7929 | Bim                        | 1.20 | 1.42 | 2.03 | 1.81 | 1.51 | 1.36 |
| C6118 | CDK5                       | 0.82 | 0.98 | 0.84 | 0.70 | 0.70 | 0.81 |
| B1684 | Bmf                        | 0.37 | 0.86 | 0.64 | 1.19 | 1.03 | 1.02 |
| B1559 | Bmf                        | 0.56 | 1.04 | 0.96 | 1.33 | 1.17 | 1.12 |
| B7931 | BNIP3                      | 0.81 | 1.10 | 0.76 | 0.85 | 0.96 | 0.98 |
| B7810 | BOB1 OBF1                  | 0.92 | 1.06 | 1.25 | 1.19 | 0.94 | 0.98 |
| B8184 | Brg1 hSNF2b                | 1.01 | 1.05 | 0.92 | 0.90 | 0.90 | 0.96 |
| B0811 | BTK                        | 0.89 | 1.05 | 0.95 | 0.72 | 0.98 | 1.03 |
| B0686 | BTK                        | 0.94 | 0.99 | 0.78 | 0.74 | 0.91 | 1.02 |
| B0561 | BUB1                       | 0.90 | 0.94 | 0.74 | 0.69 | 0.65 | 0.75 |
| B9310 | BUBR1                      | 0.86 | 1.00 | 0.63 | 0.47 | 0.52 | 0.85 |
| A5844 | cAbl                       | 0.91 | 1.01 | 0.91 | 0.77 | 0.79 | 0.94 |
| C9603 | cCbl                       | 0.84 | 0.96 | 0.88 | 0.79 | 0.93 | 0.97 |
| E2777 | cerbB2                     | 0.74 | 0.74 | 0.62 | 0.63 | 0.64 | 0.70 |
| E8767 | cerbB3                     | 0.82 | 0.88 | 0.60 | 0.54 | 0.68 | 0.83 |
| E5900 | cerbB4                     | 0.84 | 0.91 | 0.65 | 0.59 | 0.76 | 0.92 |
| J2128 | cJun pSer63                | 0.56 | 1.03 | 0.81 | 1.33 | 0.26 | 1.11 |
| J2253 | cJun pSer73                | 0.90 | 1.00 | 0.76 | 1.56 | 0.77 | 0.89 |
| M4439 | cMyc                       | 1.02 | 1.06 | 1.10 | 0.97 | 1.26 | 1.27 |
| C3956 | cMyc                       | 0.77 | 0.96 | 0.70 | 0.77 | 0.76 | 0.89 |
| U3254 | Uvomorulin ECadherin       | 0.81 | 0.98 | 0.80 | 0.74 | 0.80 | 0.97 |
| C2542 | NCadherin                  | 1.32 | 1.02 | 1.46 | 1.17 | 1.29 | 1.25 |
| C2667 | NCadherin                  | 0.83 | 0.83 | 0.71 | 0.64 | 0.76 | 0.77 |
| C1821 | Pan Cadherin               | 0.84 | 1.00 | 1.06 | 0.99 | 1.01 | 1.00 |
| C7354 | CalbindinD28K              | 0.81 | 0.84 | 0.80 | 0.76 | 0.70 | 0.76 |
| C1956 | Calcineurin aSubunit       | 0.92 | 0.94 | 1.05 | 1.02 | 0.89 | 0.88 |
| C6542 | Caldesmon                  | 0.89 | 0.87 | 0.70 | 0.69 | 0.61 | 0.63 |
| C7055 | Calmodulin                 | 0.94 | 0.93 | 0.74 | 0.78 | 0.58 | 0.51 |
| C4731 | Calnexin                   | 1.27 | 1.26 | 1.14 | 1.16 | 1.27 | 1.23 |
| C2687 | Calponin                   | 1.00 | 1.02 | 1.07 | 0.96 | 0.84 | 0.89 |
| C4606 | Calreticulin               | 0.95 | 1.00 | 0.97 | 1.00 | 0.96 | 0.94 |
| C7479 | Calretinin                 | 0.87 | 0.84 | 0.76 | 0.73 | 0.62 | 0.65 |
| C7867 | Claspin                    | 0.95 | 0.98 | 0.97 | 0.97 | 0.88 | 0.96 |
| C2851 | CaM Kinase IV CaMKIV       | 0.96 | 0.99 | 0.96 | 1.02 | 0.94 | 0.95 |
| C7099 | CaM Kinase Kinase a CaMKKa | 0.84 | 0.84 | 0.70 | 0.67 | 0.69 | 0.72 |
| C6974 | CaM Kinase IIa             | 1.02 | 1.04 | 1.07 | 1.09 | 1.03 | 1.03 |
| C9973 | CaM Kinase IV              | 0.97 | 1.01 | 0.96 | 1.00 | 1.00 | 0.98 |
| C4856 | CASK LIN2                  | 0.75 | 0.74 | 0.64 | 0.71 | 0.74 | 0.75 |
| C3617 | Casein Kinase 2b           | 1.04 | 1.11 | 1.33 | 1.33 | 1.65 | 1.44 |
| C7349 | Caspase 2                  | 1.02 | 1.04 | 1.00 | 1.00 | 1.11 | 1.07 |
| C9598 | Caspase 3                  | 1.04 | 1.05 | 1.03 | 1.02 | 1.01 | 0.98 |
| C8487 | Caspase 3 Active           | 1.06 | 1.11 | 1.10 | 1.14 | 1.10 | 1.07 |
| C4481 | Caspase 4                  | 0.94 | 0.98 | 1.07 | 1.13 | 1.28 | 1.19 |
| C3392 | Caspase 4                  | 0.99 | 1.03 | 1.06 | 1.19 | 1.22 | 1.20 |
| C6979 | Caspase 5                  | 0.88 | 0.95 | 1.05 | 0.88 | 0.90 | 0.90 |

|       |                          |      |      |      |      |      |      |
|-------|--------------------------|------|------|------|------|------|------|
| C7599 | Caspase 6                | 0.81 | 0.83 | 0.82 | 0.95 | 0.87 | 0.86 |
| C7724 | Caspase 7                | 0.82 | 0.84 | 0.81 | 0.95 | 0.84 | 0.85 |
| C1104 | Caspase 7                | 0.92 | 0.92 | 0.70 | 0.79 | 0.68 | 0.74 |
| C3101 | Caspase 8                | 0.95 | 0.98 | 1.01 | 1.05 | 0.95 | 0.93 |
| C2976 | Caspase 8                | 0.91 | 0.98 | 0.94 | 1.02 | 0.92 | 0.92 |
| C4106 | Caspase 8                | 0.81 | 0.77 | 0.48 | 0.29 | 0.15 | 0.05 |
| C7849 | ProCaspase 8             | 0.93 | 0.97 | 1.03 | 1.07 | 0.96 | 0.94 |
| C7729 | Caspase 9                | 0.82 | 0.85 | 0.75 | 0.84 | 0.71 | 0.75 |
| C4356 | Caspase 9                | 0.98 | 1.04 | 1.07 | 0.85 | 0.61 | 0.70 |
| C8351 | Caspase10                | 0.83 | 0.87 | 0.77 | 0.89 | 0.72 | 0.77 |
| C1229 | Caspase 10               | 0.86 | 0.81 | 0.66 | 0.66 | 0.61 | 0.55 |
| C1354 | Caspase11                | 0.85 | 0.87 | 0.70 | 0.81 | 0.72 | 0.78 |
| C7611 | Caspase12                | 1.05 | 1.13 | 1.23 | 1.31 | 1.28 | 1.24 |
| C8854 | Caspase13                | 1.88 | 1.77 | 2.13 | 2.19 | 2.09 | 1.99 |
| C0979 | Catalase                 | 0.90 | 0.92 | 0.77 | 0.87 | 0.95 | 0.91 |
| C8114 | a E Catenin              | 1.07 | 1.09 | 1.02 | 1.11 | 1.08 | 1.09 |
| C8239 | aNCatenin                | 1.07 | 1.07 | 0.98 | 1.08 | 1.07 | 1.09 |
| C2081 | aCatenin                 | 0.85 | 0.88 | 0.64 | 0.72 | 0.70 | 0.75 |
| C7207 | bCatenin                 | 0.76 | 0.89 | 0.75 | 0.90 | 0.81 | 0.83 |
| C7082 | bCatenin                 | 1.02 | 1.09 | 1.10 | 1.10 | 1.24 | 1.19 |
| C8616 | bCatenin pThr41          | 1.08 | 1.15 | 1.14 | 1.28 | 1.34 | 1.28 |
| C4231 | bCatenin pSer33pSer37    | 1.04 | 1.05 | 1.03 | 1.26 | 1.24 | 1.12 |
| C5615 | phospho-b-Catenin pSer45 | 1.03 | 1.01 | 1.08 | 1.19 | 1.15 | 1.13 |
| C2363 | bCatenin pSer33          | 0.96 | 1.08 | 0.99 | 1.07 | 1.04 | 1.11 |
| C4864 | dCatenin NPRAP           | 1.14 | 1.28 | 1.14 | 1.22 | 1.30 | 1.23 |
| C0715 | Cathepsin D              | 1.02 | 1.06 | 0.95 | 0.99 | 1.02 | 1.00 |
| C2970 | Cathepsin L              | 0.87 | 0.85 | 0.99 | 0.82 | 0.77 | 0.76 |
| C3237 | Caveolin1                | 0.92 | 1.01 | 1.23 | 1.18 | 1.19 | 1.17 |
| C5987 | CD40                     | 0.78 | 0.54 | 1.25 | 0.99 | 1.41 | 1.21 |
| C2238 | Cdc14A                   | 0.86 | 0.82 | 0.64 | 0.59 | 0.39 | 0.16 |
| C0349 | Cdc25c                   | 0.83 | 0.87 | 0.88 | 0.79 | 0.65 | 0.64 |
| C9479 | Cdc25A                   | 0.74 | 0.71 | 0.64 | 0.43 | 0.40 | 0.43 |
| C7104 | Cdc27                    | 1.02 | 1.10 | 1.21 | 1.13 | 1.06 | 1.05 |
| C0224 | Cdc6                     | 1.05 | 1.12 | 1.28 | 1.22 | 1.10 | 1.07 |
| C6613 | Cdc7 Kinase              | 0.92 | 0.90 | 0.76 | 0.68 | 0.60 | 0.67 |
| C7855 | Cdh1                     | 0.93 | 1.01 | 0.99 | 0.97 | 0.91 | 0.90 |
| C4973 | Cdk1                     | 0.86 | 0.78 | 1.04 | 1.11 | 0.97 | 1.10 |
| C9987 | Cdk3                     | 0.87 | 1.07 | 1.18 | 1.41 | 1.17 | 1.16 |
| C8218 | Cdk4                     | 0.89 | 0.89 | 0.76 | 0.88 | 0.76 | 0.78 |
| C8343 | Cdk6                     | 0.89 | 0.87 | 0.75 | 0.74 | 0.70 | 0.73 |
| C7089 | Cdk7 cak                 | 0.93 | 0.93 | 0.84 | 0.87 | 0.94 | 0.92 |
| T1827 | TBP                      | 2.11 | 1.87 | 1.43 | 1.46 | 1.46 | 1.45 |
| C7488 | CENPE                    | 1.14 | 1.12 | 1.10 | 1.13 | 1.16 | 1.10 |
| C7736 | Centrin                  | 0.83 | 0.83 | 0.73 | 0.85 | 0.77 | 0.82 |
| C9358 | Chk1                     | 1.47 | 1.46 | 1.41 | 1.37 | 1.46 | 1.35 |
| C9108 | Chk2                     | 0.92 | 0.94 | 1.08 | 1.15 | 1.08 | 1.08 |
| C9233 | Chk2                     | 1.28 | 1.36 | 1.55 | 1.56 | 1.54 | 1.47 |
| C8035 | Chondroitin Sulfate      | 0.80 | 0.77 | 0.57 | 0.54 | 0.43 | 0.53 |
| C5867 | Ciliated Cell Marker     | 0.94 | 0.90 | 0.86 | 0.69 | 0.68 | 0.64 |
| C8116 | CIN85                    | 0.97 | 1.01 | 1.00 | 1.03 | 0.99 | 0.92 |
| C5367 | Casein Kinase 2a         | 1.04 | 0.99 | 1.02 | 0.93 | 0.95 | 0.90 |
| C1985 | Clathrin Light Chain     | 1.08 | 1.10 | 1.34 | 1.13 | 1.22 | 1.23 |
| C1860 | Clathrin Heavy Chain     | 0.99 | 0.95 | 0.81 | 0.79 | 0.81 | 0.71 |
| C5922 | CNPase                   | 1.07 | 1.07 | 1.11 | 1.13 | 1.02 | 0.96 |
| C8736 | Cofilin                  | 1.14 | 1.20 | 0.86 | 0.91 | 0.90 | 0.93 |
| C1862 | Coilin                   | 2.10 | 1.95 | 0.95 | 0.69 | 0.76 | 0.82 |
| C1926 | Collagen Type IV         | 1.16 | 1.07 | 0.92 | 0.92 | 0.86 | 0.78 |
| C3470 | Connexin 32              | 0.87 | 0.91 | 0.82 | 0.88 | 0.77 | 0.76 |
| NA    | Negative Control         | 0.98 | 1.06 | 0.86 | 2.24 | 2.39 | 2.04 |

|       |                                |      |      |      |      |      |      |
|-------|--------------------------------|------|------|------|------|------|------|
| C6344 | Connexin 32                    | 0.91 | 0.88 | 0.83 | 0.77 | 0.76 | 0.77 |
| C8093 | Connexin43                     | 0.84 | 0.83 | 0.64 | 0.65 | 0.62 | 0.68 |
| C6219 | Connexin 43                    | 0.90 | 0.94 | 0.76 | 0.88 | 0.85 | 0.82 |
| G6160 | bCOP                           | 1.29 | 1.29 | 1.17 | 1.21 | 1.13 | 1.08 |
| C6987 | Cortactin                      | 1.08 | 1.13 | 1.09 | 0.98 | 1.13 | 1.05 |
| C5348 | Corticotropin Releasing Factor | 0.97 | 1.02 | 1.03 | 1.06 | 1.02 | 0.98 |
| C9354 | COX II                         | 0.87 | 0.82 | 0.90 | 0.91 | 1.05 | 0.91 |
| C0978 | CrkL                           | 1.12 | 1.12 | 1.07 | 1.02 | 1.10 | 1.06 |
| C0853 | Crk II                         | 1.02 | 1.06 | 1.08 | 0.95 | 1.05 | 1.01 |
| C7863 | Csk                            | 1.18 | 1.21 | 0.88 | 0.92 | 0.89 | 0.90 |
| C9491 | CtBP1                          | 1.12 | 1.14 | 0.88 | 0.94 | 0.95 | 0.97 |
| C8741 | CtBP1                          | 1.00 | 0.90 | 1.14 | 0.99 | 1.35 | 1.22 |
| C5112 | CUGBP1                         | 1.19 | 0.95 | 0.97 | 0.82 | 0.84 | 0.73 |
| C4710 | Cyclin A                       | 0.95 | 0.92 | 0.70 | 0.10 | 0.49 | 0.45 |
| C8831 | Cyclin B1                      | 1.00 | 1.01 | 1.10 | 1.16 | 1.13 | 1.12 |
| C5588 | Cyclin D1                      | 1.01 | 1.00 | 0.99 | 1.05 | 1.07 | 1.06 |
| C7464 | Cyclin D1                      | 1.07 | 0.99 | 1.64 | 1.53 | 1.24 | 1.25 |
| C7339 | Cyclin D2                      | 0.97 | 0.94 | 0.90 | 0.95 | 0.72 | 0.76 |
| C7214 | Cyclin D3                      | 0.92 | 0.90 | 0.78 | 0.97 | 0.83 | 0.88 |
| C5351 | Cyclin H                       | 0.95 | 0.90 | 0.87 | 0.83 | 0.74 | 0.84 |
| C3095 | Cystatin A                     | 1.01 | 0.95 | 0.90 | 0.81 | 0.76 | 0.83 |
| C8979 | Cytohesin1                     | 1.08 | 1.09 | 1.34 | 1.35 | 1.21 | 1.20 |
| C5176 | Cytokeratin peptide4           | 0.96 | 0.92 | 0.81 | 0.86 | 0.78 | 0.79 |
| C7785 | Cytokeratin CK5                | 0.96 | 0.86 | 0.63 | 0.41 | 0.45 | 0.45 |
| C6417 | Cytokeratin peptide 7          | 0.95 | 0.95 | 0.96 | 0.73 | 0.71 | 0.74 |
| C7034 | Cytokeratin 8 12               | 0.97 | 0.94 | 0.79 | 0.47 | 0.87 | 0.93 |
| C6909 | Cytokeratin 8 13               | 1.23 | 1.17 | 1.33 | 1.12 | 1.06 | 1.07 |
| C0791 | Cytokeratin peptide 13         | 0.92 | 0.85 | 0.90 | 0.86 | 0.89 | 0.88 |
| C9179 | Cytokeratin Peptide 17         | 0.81 | 0.75 | 0.67 | 0.67 | 0.59 | 0.63 |
| C1399 | Cytokeratin peptide 18         | 0.97 | 0.95 | 0.95 | 0.88 | 0.83 | 0.83 |
| C6930 | Cytokeratin peptide 19         | 0.98 | 0.95 | 0.88 | 0.96 | 0.93 | 1.07 |
| C2931 | Pan Cytokeratin                | 0.94 | 1.01 | 0.74 | 0.77 | 0.80 | 0.91 |
| D2178 | DAPK                           | 0.98 | 1.01 | 0.96 | 0.95 | 0.89 | 0.93 |
| D4941 | DAPK pSer308                   | 0.91 | 0.86 | 0.82 | 0.72 | 0.69 | 0.66 |
| D3191 | DAK Kinase 2                   | 1.17 | 1.09 | 1.64 | 1.74 | 1.58 | 1.43 |
| D7810 | Daxx                           | 1.04 | 1.02 | 1.15 | 1.18 | 1.21 | 1.12 |
| D3566 | DcR1                           | 1.30 | 1.24 | 2.14 | 2.13 | 2.20 | 2.19 |
| D3188 | DcR2                           | 0.73 | 0.76 | 0.89 | 1.88 | 1.36 | 1.20 |
| D1814 | DcR3                           | 1.43 | 1.39 | 1.97 | 2.22 | 2.35 | 2.31 |
| D3316 | DEDAF                          | 1.23 | 1.23 | 1.41 | 2.02 | 2.01 | 1.64 |
| D1033 | Desmin                         | 1.04 | 1.10 | 1.44 | 1.37 | 1.21 | 1.20 |
| D1286 | Desmosomal Protein             | 0.91 | 0.94 | 0.80 | 0.96 | 0.75 | 0.73 |
| D8940 | Destrin ADF                    | 0.93 | 0.90 | 0.85 | 0.93 | 0.74 | 0.73 |
| D0188 | DNASE I                        | 1.02 | 0.95 | 1.45 | 1.57 | 1.32 | 1.28 |
| D1689 | DNASE II                       | 1.09 | 1.06 | 1.06 | 1.99 | 1.83 | 1.49 |
| D4567 | DNMT1                          | 1.01 | 1.03 | 1.08 | 1.16 | 1.04 | 1.01 |
| D4692 | DNMT1                          | 0.84 | 0.86 | 0.84 | 1.02 | 0.93 | 0.90 |
| D0180 | DOPA Decarboxylase             | 1.06 | 1.04 | 1.07 | 1.06 | 1.37 | 1.33 |
| D7438 | DP2                            | 0.91 | 0.93 | 0.81 | 0.94 | 0.98 | 0.97 |
| D3563 | DR3                            | 1.79 | 1.91 | 2.22 | 2.06 | 2.58 | 2.20 |
| D3813 | DR4                            | 0.59 | 0.46 | 0.60 | 0.57 | 0.40 | 0.56 |
| D3938 | DR5                            | 1.37 | 1.38 | 1.50 | 1.95 | 2.16 | 1.92 |
| D1564 | DR6                            | 1.69 | 1.65 | 2.02 | 2.13 | 2.65 | 2.25 |
| D1314 | DRAK1                          | 1.10 | 1.10 | 1.08 | 2.12 | 1.96 | 1.43 |
| D8168 | Dystrophin                     | 1.08 | 1.05 | 1.21 | 1.11 | 1.15 | 1.16 |
| D8043 | Dystrophin                     | 1.13 | 1.13 | 1.11 | 1.19 | 1.12 | 1.11 |
| E9026 | E2F1                           | 0.84 | 0.87 | 0.97 | 1.27 | 1.10 | 1.02 |
| E8901 | E2F1                           | 0.90 | 0.90 | 0.84 | 0.96 | 0.83 | 0.88 |
| E8776 | E2F2                           | 0.90 | 0.91 | 0.86 | 1.01 | 0.85 | 0.89 |

|       |                                      |      |      |      |      |      |      |
|-------|--------------------------------------|------|------|------|------|------|------|
| E8651 | E2F3                                 | 0.97 | 0.92 | 0.80 | 0.93 | 0.77 | 0.77 |
| E8526 | E2F4                                 | 0.95 | 0.88 | 0.86 | 0.95 | 0.77 | 0.75 |
| E8655 | E6AP                                 | 1.02 | 0.97 | 0.87 | 1.13 | 0.79 | 0.85 |
| E3138 | EGF receptor                         | 0.96 | 0.94 | 1.12 | 1.12 | 0.87 | 0.96 |
| E1523 | ERK5 BIG MAPKBMK1                    | 0.99 | 0.99 | 1.02 | 1.03 | 1.05 | 1.02 |
| E4013 | Elastin                              | 0.93 | 0.91 | 0.83 | 1.02 | 0.82 | 0.81 |
| E4531 | ELKS                                 | 0.96 | 0.93 | 0.79 | 0.96 | 0.72 | 0.71 |
| E6280 | Endothelial Cell Protein C Receptor  | 0.98 | 0.93 | 0.84 | 1.11 | 0.83 | 0.84 |
| E9653 | Endothelial Cells                    | 0.99 | 0.91 | 0.88 | 1.01 | 0.87 | 0.86 |
| E0771 | Endothelin                           | 1.00 | 0.97 | 1.05 | 1.14 | 0.96 | 0.97 |
| E2520 | Epidermal Growth Factor              | 1.54 | 1.37 | 1.18 | 1.17 | 1.37 | 1.30 |
| E0143 | Episialin                            | 1.29 | 1.29 | 1.33 | 1.37 | 1.49 | 1.44 |
| E5031 | ERP57                                | 0.95 | 0.94 | 0.86 | 1.01 | 0.89 | 0.88 |
| E0521 | Estrogen Receptor                    | 1.04 | 1.00 | 0.98 | 1.04 | 0.98 | 1.00 |
| E1396 | Estrogen receptor                    | 1.13 | 1.07 | 1.09 | 1.14 | 1.09 | 1.07 |
| E1531 | Exportin T                           | 1.04 | 1.04 | 1.18 | 1.32 | 1.29 | 1.32 |
| E8897 | Ezrin                                | 0.93 | 0.92 | 0.91 | 1.03 | 0.95 | 0.92 |
| F3428 | F1A                                  | 1.68 | 1.62 | 1.77 | 2.19 | 2.11 | 1.94 |
| F8053 | FADD                                 | 1.09 | 1.10 | 1.20 | 1.42 | 1.29 | 1.18 |
| F2918 | Focal Adhesion Kinase pp125FAK       | 1.00 | 0.97 | 1.03 | 1.07 | 1.00 | 0.97 |
| F9051 | FAK Phospho pSer772                  | 2.21 | 1.26 | 1.28 | 2.12 | 1.46 | 1.41 |
| F9301 | FAK Phospho pSer910                  | 1.67 | 4.70 | 1.20 | 1.57 | 1.45 | 1.50 |
| F7926 | FAK pTyr397                          | 1.05 | 1.08 | 0.89 | 0.93 | 1.01 | 0.75 |
| F8926 | FAK pTyr577                          | 1.91 | 1.48 | 1.35 | 1.61 | 1.36 | 1.13 |
| F5303 | Falkor PHD1                          | 0.98 | 0.89 | 0.86 | 0.88 | 0.80 | 0.90 |
| F4424 | Fas CD95 Apo1                        | 1.03 | 0.94 | 0.89 | 1.05 | 0.79 | 0.80 |
| F2051 | Fas Ligand                           | 0.90 | 0.88 | 0.77 | 0.83 | 0.73 | 0.74 |
| F1926 | Fas Ligand                           | 0.86 | 0.86 | 0.78 | 0.82 | 0.78 | 0.81 |
| F9429 | FBI1 PAKEMON                         | 0.92 | 0.79 | 0.77 | 0.61 | 0.59 | 0.81 |
| F1672 | Fibroblast Growth Factor9            | 1.03 | 1.08 | 1.16 | 1.24 | 1.19 | 1.08 |
| F0791 | Fibronectin                          | 0.97 | 0.90 | 0.79 | 0.81 | 0.82 | 0.71 |
| F3648 | Fibronectin                          | 0.87 | 0.86 | 0.76 | 0.73 | 0.80 | 0.81 |
| F7387 | Fibronectin                          | 1.00 | 0.95 | 0.94 | 0.84 | 0.95 | 0.95 |
| F1888 | Filamin                              | 0.99 | 0.93 | 1.01 | 0.91 | 0.85 | 0.87 |
| F1043 | Filensin                             | 1.06 | 1.01 | 0.93 | 0.92 | 1.09 | 0.98 |
| F6928 | FKHR FOXO1a                          | 0.91 | 0.86 | 0.75 | 0.64 | 0.88 | 0.83 |
| F2178 | FKHRL1 FOXO3a                        | 0.88 | 0.89 | 0.73 | 0.82 | 0.84 | 0.92 |
| F1304 | FKHRL1                               | 0.94 | 1.01 | 1.05 | 1.14 | 1.12 | 1.02 |
| F9925 | FLIPg d                              | 1.11 | 0.95 | 1.55 | 2.00 | 1.67 | 1.45 |
| F1054 | FOXC2                                | 1.25 | 1.10 | 1.21 | 0.87 | 1.58 | 1.40 |
| F6304 | FOXP2                                | 1.08 | 1.03 | 0.99 | 0.98 | 1.08 | 1.01 |
| F0305 | FANCD2                               | 1.10 | 1.08 | 1.00 | 1.02 | 1.01 | 0.98 |
| F1554 | FXR2                                 | 1.43 | 1.44 | 2.07 | 1.80 | 1.79 | 1.67 |
| F9052 | FRS2                                 | 0.98 | 0.90 | 0.97 | 0.95 | 0.87 | 0.86 |
| G6919 | G9a Methyltransferase                | 1.00 | 1.39 | 1.57 | 1.41 | 0.73 | 0.65 |
| G4913 | Glutamic Acid Decarboxylase 65       | 1.31 | 1.34 | 1.36 | 1.31 | 1.15 | 1.12 |
| G5038 | GAD 65                               | 1.12 | 0.99 | 1.04 | 1.03 | 0.92 | 0.95 |
| G5163 | Glutamic Acid Decarboxylase GAD65 67 | 1.29 | 1.21 | 0.98 | 1.04 | 1.14 | 1.10 |
| G6916 | GADD153                              | 0.97 | 1.02 | 0.89 | 0.92 | 0.83 | 0.84 |
| G6666 | GAP11P4BP                            | 1.22 | 1.10 | 0.93 | 1.02 | 0.76 | 0.79 |
| G8795 | GAPDH                                | 0.90 | 0.95 | 0.89 | 0.90 | 0.97 | 0.90 |
| G0290 | GATA1                                | 0.79 | 0.86 | 0.82 | 0.94 | 0.89 | 0.91 |
| G4896 | Gelsolin                             | 1.27 | 1.34 | 1.09 | 0.87 | 0.81 | 0.92 |
| G6669 | Gemin 2                              | 1.08 | 0.99 | 0.92 | 0.77 | 0.77 | 0.79 |
| G6544 | Gemin3                               | 1.09 | 0.96 | 1.22 | 1.07 | 1.00 | 1.01 |
| G9269 | GFAP Glial Fibrillary Acidic Protein | 0.92 | 1.35 | 1.14 | 1.00 | 0.98 | 0.95 |
| G3893 | GFAP                                 | 1.03 | 1.02 | 1.43 | 0.98 | 1.07 | 1.18 |
| G6670 | Growth Factor Independence1          | 1.13 | 1.04 | 0.84 | 0.59 | 0.74 | 0.85 |
| G9038 | Glutamate receptor NMDAR 2a          | 0.94 | 0.95 | 0.97 | 1.14 | 1.05 | 1.02 |

|       |                                    |      |      |      |      |      |      |
|-------|------------------------------------|------|------|------|------|------|------|
| G2781 | Glutamine Synthetase               | 1.08 | 1.07 | 1.15 | 1.09 | 1.11 | 1.09 |
| G7914 | Glycogen Synthase Kinase3b         | 0.93 | 0.89 | 0.71 | 0.47 | 0.75 | 0.80 |
| G4414 | Glycogen Synthase Kinase3          | 1.03 | 1.04 | 0.97 | 0.94 | 0.95 | 0.95 |
| G6414 | Glycogen Synthase Kinase3 GSK3     | 1.10 | 1.09 | 1.25 | 1.00 | 1.15 | 1.16 |
| G1044 | GRANZYME B                         | 1.02 | 0.84 | 0.75 | 0.83 | 0.84 | 0.87 |
| G2791 | Grb2                               | 1.49 | 1.59 | 1.34 | 1.32 | 1.24 | 1.16 |
| G7670 | GRK2                               | 1.07 | 1.07 | 1.38 | 1.19 | 1.30 | 1.22 |
| G6541 | GRP1                               | 0.97 | 0.91 | 1.20 | 1.04 | 1.12 | 1.02 |
| G4170 | GRP75                              | 1.38 | 1.26 | 1.67 | 1.48 | 1.67 | 1.53 |
| G8918 | GRP78 BiP                          | 1.05 | 1.05 | 1.15 | 1.23 | 1.20 | 1.13 |
| G4420 | GRP94                              | 1.05 | 0.82 | 1.52 | 1.56 | 1.39 | 1.23 |
| A8103 | hABH1                              | 1.07 | 0.95 | 0.91 | 0.99 | 0.76 | 0.80 |
| A8228 | hABH2                              | 1.04 | 0.94 | 0.96 | 1.03 | 0.73 | 0.81 |
| A8353 | hABH3                              | 1.05 | 0.92 | 0.85 | 1.23 | 0.63 | 0.62 |
| H9787 | hBRM hSNF2a                        | 1.00 | 0.87 | 1.32 | 1.93 | 0.72 | 0.81 |
| H7161 | HAT1                               | 0.89 | 0.86 | 0.85 | 1.02 | 0.86 | 0.86 |
| H3284 | HDAC1                              | 1.05 | 1.03 | 1.13 | 1.13 | 1.04 | 1.02 |
| H6287 | HDAC1                              | 1.08 | 1.06 | 1.47 | 1.36 | 1.39 | 1.29 |
| H3159 | HDAC2                              | 1.05 | 1.02 | 1.17 | 1.12 | 1.02 | 1.01 |
| H2663 | HDAC2                              | 1.12 | 1.09 | 1.07 | 1.15 | 1.11 | 1.12 |
| H6537 | HDAC3                              | 0.91 | 0.89 | 0.78 | 0.87 | 1.00 | 0.99 |
| H3034 | HDAC3                              | 1.22 | 1.14 | 1.27 | 1.19 | 1.14 | 1.08 |
| H9411 | HDAC4                              | 0.96 | 0.97 | 0.86 | 0.97 | 0.97 | 0.97 |
| H9536 | HDAC4                              | 0.94 | 0.94 | 0.86 | 0.96 | 0.99 | 0.97 |
| H4538 | HDAC5                              | 1.15 | 1.19 | 1.32 | 1.47 | 1.43 | 1.36 |
| H8163 | HDAC5                              | 1.06 | 1.04 | 1.03 | 0.90 | 1.17 | 1.03 |
| H2287 | HDAC6                              | 1.52 | 1.41 | 1.68 | 1.52 | 1.57 | 1.32 |
| H2537 | HDAC7                              | 0.85 | 0.89 | 1.10 | 1.49 | 1.02 | 1.00 |
| H6663 | HDAC7                              | 1.26 | 1.27 | 1.45 | 1.46 | 1.50 | 1.44 |
| H6412 | HDAC8                              | 1.10 | 1.19 | 1.57 | 1.59 | 1.46 | 1.37 |
| H3413 | HDAC10                             | 0.90 | 0.96 | 1.02 | 1.41 | 0.97 | 0.94 |
| H2913 | HDAC11                             | 1.09 | 1.01 | 1.36 | 1.27 | 0.97 | 1.10 |
| H9163 | HDRP MITR                          | 0.95 | 0.89 | 0.77 | 0.86 | 0.73 | 0.73 |
| H4163 | Heat Shock Factor 1                | 0.94 | 0.70 | 0.65 | 0.20 | 0.28 | 0.31 |
| H6788 | Heat Shock Factor 2                | 1.03 | 1.03 | 1.15 | 1.22 | 1.14 | 1.09 |
| H0148 | Heat Shock Protein 25              | 0.95 | 0.89 | 0.88 | 1.01 | 0.71 | 0.64 |
| P1498 | Heat Shock Protein 27              | 1.01 | 1.03 | 1.28 | 1.30 | 1.18 | 1.12 |
| H2289 | HSP 27 25                          | 1.08 | 1.06 | 1.39 | 1.27 | 1.26 | 1.12 |
| H5147 | HSP70                              | 1.11 | 0.98 | 1.38 | 2.65 | 0.81 | 0.85 |
| H1775 | HSP 90                             | 1.07 | 0.71 | 1.13 | 0.68 | 0.32 | 0.62 |
| H7412 | Heat Shock Protein 110             | 1.08 | 1.06 | 1.23 | 1.35 | 1.21 | 1.12 |
| H7287 | Heat Shock Protein 110             | 1.25 | 1.07 | 1.53 | 1.66 | 1.68 | 1.58 |
| H9286 | Acetyl Histone H3 AcLys9           | 1.43 | 1.37 | 1.49 | 1.31 | 1.43 | 1.34 |
| H0913 | Acetyl Histone H3 AcLys9           | 0.97 | 0.91 | 0.70 | 0.64 | 0.80 | 0.79 |
| H9161 | Acetyl phospho Histone H3 AL9 S10  | 1.35 | 1.28 | 1.52 | 1.42 | 1.55 | 1.33 |
| H0788 | Acetyl phospho Histone H3 AL9 S10  | 1.25 | 1.22 | 1.32 | 1.38 | 1.49 | 1.35 |
| D5692 | Dimethyl Histone H3 diMeLys4       | 1.14 | 1.09 | 1.29 | 1.19 | 1.15 | 1.07 |
| D5567 | Dimethyl Histone H3 diMeLys9       | 1.27 | 1.18 | 1.18 | 1.13 | 1.05 | 1.00 |
| H7162 | methyl Histone H3 MeLys9           | 0.89 | 0.85 | 0.79 | 0.98 | 0.84 | 0.80 |
| H5912 | phosphoHistone H2AX pSer139        | 1.28 | 1.21 | 1.60 | 1.34 | 1.27 | 1.22 |
| H6409 | Histone H3 pSer10                  | 1.26 | 1.25 | 1.56 | 1.70 | 1.51 | 1.43 |
| H9908 | Histone H3 pSer28                  | 0.91 | 0.90 | 0.87 | 1.03 | 1.00 | 0.96 |
| H0412 | Histone H3 pSer10                  | 1.06 | 1.02 | 1.23 | 1.09 | 1.11 | 1.08 |
| S8316 | SUV39H1 Histone Methyl Transferase | 0.94 | 0.77 | 0.86 | 0.75 | 0.79 | 0.79 |
| H9537 | HMG1                               | 0.84 | 0.73 | 0.75 | 0.33 | 0.66 | 0.68 |
| M5818 | hMps1                              | 1.02 | 0.94 | 0.79 | 0.62 | 0.70 | 0.87 |
| R4528 | hnRNPA1                            | 0.99 | 0.92 | 0.76 | 0.72 | 0.79 | 0.85 |
| R9778 | hnRNPA1                            | 1.02 | 0.95 | 0.84 | 0.77 | 0.77 | 0.76 |
| R4653 | hnRNPA2B1                          | 1.12 | 1.09 | 1.19 | 0.92 | 1.08 | 1.09 |

|       |                                                          |      |      |      |      |      |      |
|-------|----------------------------------------------------------|------|------|------|------|------|------|
| R5028 | hnRNPC1C2                                                | 1.02 | 0.96 | 0.83 | 0.74 | 0.79 | 1.01 |
| R8903 | hnRNP KJ                                                 | 1.05 | 0.93 | 0.91 | 0.86 | 0.77 | 0.85 |
| R4903 | hnRNPL                                                   | 1.00 | 0.91 | 0.86 | 0.64 | 0.76 | 0.75 |
| R5653 | hnRNPM                                                   | 1.05 | 0.95 | 0.86 | 0.46 | 0.75 | 0.77 |
| R6278 | hnRNPU                                                   | 1.19 | 0.75 | 0.77 | 0.63 | 0.39 | 1.00 |
| R3777 | hnRNP M3 M4                                              | 1.02 | 0.99 | 0.96 | 0.93 | 1.08 | 1.06 |
| P5988 | hPIK1                                                    | 1.06 | 1.04 | 0.97 | 0.94 | 1.10 | 1.10 |
| P6123 | hPIK1                                                    | 1.06 | 0.98 | 0.90 | 0.64 | 1.17 | 1.17 |
| H9912 | hSNF5 IN11                                               | 0.92 | 0.90 | 0.79 | 0.92 | 0.97 | 0.98 |
| A4605 | IASPP                                                    | 1.20 | 1.12 | 1.33 | 1.16 | 1.32 | 1.18 |
| I1659 | IFI16                                                    | 0.98 | 0.75 | 0.64 | 0.18 | 0.56 | 0.54 |
| I0505 | IkB a                                                    | 1.18 | 1.14 | 1.22 | 1.11 | 1.35 | 1.23 |
| I6139 | IKKa                                                     | 0.89 | 0.84 | 0.68 | 0.77 | 0.77 | 0.82 |
| I0783 | ILK                                                      | 1.47 | 1.36 | 1.83 | 1.55 | 1.55 | 1.34 |
| I1907 | ILK                                                      | 1.30 | 1.20 | 1.29 | 1.20 | 1.24 | 1.15 |
| I4782 | ILP2                                                     | 1.02 | 0.85 | 1.22 | 1.41 | 1.16 | 1.00 |
| I9658 | Importina1                                               | 1.79 | 3.02 | 1.51 | 1.56 | 1.13 | 1.60 |
| I9783 | Importin a3                                              | 1.80 | 1.48 | 1.38 | 0.53 | 0.57 | 0.32 |
| I9908 | Importina 5 7                                            | 1.21 | 1.55 | 1.91 | 1.57 | 1.15 | 1.53 |
| I5283 | INCENP                                                   | 1.05 | 1.02 | 1.21 | 1.19 | 1.04 | 1.05 |
| I3659 | ING1                                                     | 1.11 | 1.01 | 2.18 | 1.73 | 1.42 | 1.35 |
| I0282 | alInterexin                                              | 1.08 | 0.96 | 1.24 | 1.49 | 1.01 | 1.15 |
| J3395 | JAB 1                                                    | 0.96 | 1.02 | 1.41 | 1.26 | 1.26 | 1.27 |
| J3020 | JAB1                                                     | 0.92 | 0.92 | 0.81 | 0.82 | 0.79 | 0.83 |
| J3774 | JAK1                                                     | 1.18 | 1.16 | 2.14 | 1.90 | 1.22 | 1.49 |
| J4500 | cJun N Terminal Kinase                                   | 1.04 | 0.96 | 0.93 | 0.92 | 0.67 | 0.76 |
| J4750 | JNK Activated Diphosphorylated JNK                       | 1.25 | 1.25 | 1.85 | 1.68 | 1.41 | 1.46 |
| K0514 | KCNK9                                                    | 1.16 | 1.12 | 1.78 | 1.74 | 1.73 | 1.65 |
| K4263 | Kaiso                                                    | 1.33 | 1.31 | 2.27 | 1.95 | 1.42 | 1.33 |
| K3638 | KIF17                                                    | 0.95 | 0.96 | 0.87 | 0.94 | 0.85 | 0.96 |
| K3513 | KIF3A                                                    | 1.27 | 1.27 | 1.26 | 1.12 | 1.42 | 1.32 |
| K4261 | KSR                                                      | 1.06 | 1.31 | 0.92 | 0.99 | 1.11 | 1.09 |
| K2882 | Ku Antigen                                               | 1.01 | 0.97 | 0.96 | 1.04 | 0.85 | 1.04 |
| L4543 | L1CAM                                                    | 1.53 | 2.91 | 1.51 | 1.49 | 1.56 | 1.50 |
| A0224 | Afadin                                                   | 1.00 | 1.00 | 0.83 | 0.91 | 0.89 | 0.93 |
| L9393 | Laminin                                                  | 1.00 | 1.69 | 0.84 | 0.98 | 0.86 | 0.87 |
| L0663 | Laminin2 a2 Chain                                        | 2.52 | 1.38 | 2.55 | 2.60 | 1.65 | 1.63 |
| L3414 | LAP2 TMPO                                                | 1.02 | 1.97 | 1.40 | 1.82 | 1.22 | 1.52 |
| L3410 | Leptin                                                   | 1.00 | 1.00 | 0.91 | 1.16 | 1.05 | 1.15 |
| L2290 | LIM Kinase1                                              | 1.22 | 1.23 | 1.25 | 1.20 | 1.32 | 1.19 |
| L1538 | LIN7                                                     | 0.98 | 0.96 | 0.86 | 0.94 | 0.81 | 0.82 |
| L7391 | LIS1                                                     | 1.07 | 0.86 | 0.82 | 0.57 | 0.53 | 0.30 |
| L7917 | LKB1                                                     | 1.17 | 1.09 | 1.33 | 1.36 | 1.27 | 1.14 |
| L4793 | LDS1                                                     | 1.15 | 1.08 | 1.11 | 1.22 | 1.16 | 1.16 |
| M8069 | Mad1                                                     | 1.20 | 1.12 | 1.31 | 1.13 | 1.22 | 1.02 |
| M8694 | Mad2                                                     | 1.13 | 0.98 | 0.82 | 0.50 | 0.42 | 0.25 |
| M5683 | MADD                                                     | 2.14 | 1.58 | 3.26 | 3.47 | 5.05 | 5.30 |
| M8194 | MAFF                                                     | 1.11 | 1.05 | 1.07 | 1.14 | 1.11 | 1.05 |
| M5691 | MAG11                                                    | 1.09 | 1.02 | 0.98 | 1.10 | 1.09 | 1.02 |
| M2441 | MAG12                                                    | 1.06 | 1.03 | 1.06 | 1.12 | 1.08 | 1.04 |
| M7802 | MAP Kinase Activated Monophosphorylated Phosphothreonine | 1.25 | 1.15 | 1.51 | 1.34 | 1.28 | 1.21 |
| M3682 | MAP Kinase Monophosphorylated Tyrosine                   | 1.34 | 1.27 | 1.71 | 1.49 | 1.67 | 1.60 |
| M9692 | MAP Kinase Activated Diphosphorylated ERK1 2             | 1.07 | 0.99 | 0.97 | 0.92 | 1.09 | 1.03 |
| M3557 | MAP Kinase Monophosphorylated Threonine                  | 1.06 | 0.92 | 0.93 | 0.90 | 0.87 | 0.82 |
| M7927 | MAP Kinase ERK1                                          | 1.52 | 1.40 | 1.15 | 1.14 | 1.29 | 1.23 |
| M5670 | MAP Kinase Erk1Erk2                                      | 1.01 | 1.00 | 0.72 | 0.74 | 0.85 | 0.91 |
| M3550 | MAP Kinase Activated Protein Kinase2 MAPKAPK2            | 1.75 | 1.68 | 1.18 | 1.15 | 1.66 | 1.42 |
| M3787 | MAP Kinase Phosphatase1 MKP1                             | 1.12 | 1.12 | 1.16 | 1.09 | 1.21 | 1.15 |
| M3807 | MAPK non phosphorylated ERK                              | 1.19 | 1.07 | 1.20 | 1.24 | 1.10 | 1.07 |

|       |                             |      |      |      |      |      |      |
|-------|-----------------------------|------|------|------|------|------|------|
| M7431 | MAP Kinase 2 ERK2           | 1.00 | 3.97 | 2.47 | 2.65 | 5.41 | 2.21 |
| M5795 | MAP Kinase Kinase MEK MAPKK | 0.99 | 0.93 | 0.83 | 0.96 | 0.96 | 0.94 |
| M2320 | MAP2 2a 2b                  | 1.07 | 0.95 | 1.09 | 1.06 | 0.95 | 0.97 |
| M4278 | MAP1                        | 1.01 | 0.89 | 1.32 | 1.03 | 0.89 | 0.88 |
| M6783 | MAP1 Light Chain            | 1.19 | 0.63 | 0.82 | 0.15 | 0.30 | 0.75 |
| M4528 | MAP1b                       | 1.00 | 1.00 | 2.25 | 2.55 | 2.64 | 2.16 |
| M9942 | MAP2                        | 1.07 | 0.84 | 3.26 | 1.00 | 0.45 | 0.88 |
| M6569 | MBD1                        | 1.50 | 0.64 | 3.96 | 0.53 | 0.66 | 0.44 |
| M7568 | MBD2a                       | 1.13 | 1.08 | 1.31 | 1.26 | 1.42 | 1.33 |
| M7318 | MBD2ab                      | 0.98 | 0.39 | 1.58 | 2.57 | 1.56 | 0.97 |
| M9817 | MBD4                        | 0.91 | 0.86 | 0.81 | 0.74 | 0.66 | 0.70 |
| M1944 | MBDin XAB1                  | 1.08 | 1.04 | 1.21 | 1.06 | 1.07 | 0.99 |
| M3320 | MBNL1                       | 0.94 | 0.63 | 0.78 | 0.68 | 0.10 | 0.28 |
| M8440 | MCH                         | 1.22 | 1.18 | 1.53 | 1.37 | 1.16 | 1.16 |
| M8434 | Mcl1                        | 1.03 | 1.00 | 1.22 | 1.18 | 1.16 | 1.09 |
| M2444 | MDC1                        | 1.37 | 1.30 | 1.67 | 1.49 | 1.68 | 1.52 |
| M8558 | MDM2                        | 1.30 | 0.81 | 0.78 | 0.70 | 1.07 | 1.00 |
| M4308 | MDM2                        | 1.08 | 0.69 | 0.88 | 0.23 | 0.65 | 0.57 |
| M7815 | MDM2                        | 1.40 | 2.63 | 2.22 | 2.53 | 2.34 | 1.91 |
| M0445 | MDMX                        | 0.68 | 0.66 | 0.74 | 0.50 | 0.70 | 0.66 |
| M9317 | MeCP2                       | 1.00 | 1.00 | 0.92 | 0.95 | 0.88 | 0.91 |
| M7443 | MeCP2                       | 1.28 | 1.10 | 1.75 | 1.00 | 1.11 | 1.85 |
| M6818 | MeCP2                       | 1.16 | 0.99 | 1.07 | 0.29 | 0.96 | 1.10 |
| M7194 | MEKK4                       | 1.19 | 1.01 | 1.17 | 1.01 | 1.27 | 1.22 |
| M4937 | Melanocortin3 Receptor      | 1.21 | 1.23 | 1.14 | 1.10 | 1.11 | 1.05 |
| M3068 | MGMT                        | 1.00 | 0.89 | 1.04 | 0.90 | 0.80 | 0.83 |
| M3319 | Mint2                       | 1.01 | 0.87 | 1.56 | 1.10 | 0.99 | 1.17 |
| L3044 | LRRK2 (PARK8)               | 1.15 | 0.88 | 2.59 | 1.47 | 1.00 | 1.35 |
| M9192 | MRP1                        | 1.27 | 1.01 | 1.06 | 1.11 | 1.62 | 1.45 |
| M3692 | MRP2                        | 1.15 | 0.91 | 0.79 | 0.17 | 1.78 | 1.44 |
| M0939 | aMSH                        | 1.09 | 1.00 | 1.06 | 1.00 | 0.95 | 0.98 |
| M2445 | MSH6                        | 2.04 | 1.42 | 1.12 | 1.08 | 1.14 | 1.28 |
| M2820 | MSH6                        | 1.20 | 1.72 | 0.86 | 0.40 | 1.57 | 1.45 |
| M5437 | MSK1                        | 1.37 | 1.25 | 1.17 | 1.12 | 1.23 | 1.20 |
| M7569 | MTA 2                       | 1.08 | 0.93 | 0.98 | 0.27 | 0.42 | 0.41 |
| M1320 | MTA1                        | 1.06 | 0.94 | 0.84 | 0.33 | 0.48 | 0.55 |
| M7693 | MTA1                        | 0.98 | 0.83 | 0.71 | 0.33 | 0.62 | 0.51 |
| M7818 | MTA2 MTA1L                  | 1.06 | 0.94 | 0.81 | 0.86 | 0.91 | 0.88 |
| M0819 | MTA3L                       | 2.07 | 1.23 | 1.29 | 1.24 | 1.55 | 1.63 |
| M3566 | MTBP                        | 1.00 | 1.60 | 2.19 | 2.96 | 1.40 | 2.48 |
| T2949 | mTOR                        | 0.95 | 0.95 | 0.76 | 0.83 | 0.84 | 0.82 |
| M2694 | Munc181                     | 1.76 | 1.29 | 1.31 | 1.29 | 1.64 | 1.45 |
| M6194 | Munc13 1                    | 2.91 | 1.50 | 1.30 | 1.20 | 1.89 | 2.09 |
| M9934 | MyD88                       | 9.51 | 2.51 | 4.75 | 3.98 | 3.72 | 2.86 |
| M1570 | Myosin                      | 1.28 | 1.32 | 1.12 | 1.10 | 1.33 | 1.30 |
| M3567 | Myosin Ib Nuclear           | 0.98 | 0.96 | 0.79 | 0.87 | 0.91 | 0.89 |
| M8064 | Myosin IIA                  | 0.95 | 0.93 | 1.09 | 1.15 | 0.89 | 0.95 |
| M5566 | Myosin IX Myr5              | 1.11 | 1.12 | 1.28 | 1.15 | 1.27 | 1.23 |
| M7905 | Myosin Light Chain Kinase   | 1.80 | 1.44 | 0.63 | 0.64 | 0.63 | 0.71 |
| M4812 | Myosin Va                   | 0.98 | 0.83 | 0.80 | 0.88 | 0.73 | 0.81 |
| M5062 | Myosin Va                   | 0.92 | 0.88 | 0.82 | 0.95 | 0.81 | 0.88 |
| M0691 | Myosin VI                   | 1.04 | 0.92 | 0.81 | 0.88 | 0.75 | 0.83 |
| M5187 | Myosin VI                   | 0.98 | 0.93 | 0.79 | 0.85 | 0.77 | 0.80 |
| N9287 | NBS1 Nibrin                 | 1.00 | 0.83 | 0.65 | 0.65 | 0.43 | 0.54 |
| N3037 | NBS1                        | 1.02 | 0.98 | 1.10 | 0.54 | 0.49 | 0.94 |
| N3162 | NBS1                        | 0.90 | 0.76 | 1.21 | 0.74 | 0.64 | 0.94 |
| N2911 | Nck2                        | 1.07 | 1.03 | 1.17 | 1.15 | 1.56 | 1.62 |
| N2786 | Nedd8                       | 1.18 | 1.13 | 1.33 | 1.29 | 1.40 | 1.44 |
| N3279 | Nerve Growth Factor b       | 1.06 | 0.81 | 0.16 | 1.00 | 0.20 | 0.73 |



|       |                                         |      |      |       |      |       |      |
|-------|-----------------------------------------|------|------|-------|------|-------|------|
| N5408 | Nerve Growth Factor Receptor            | 0.95 | 0.97 | 0.93  | 0.64 | 0.56  | 0.62 |
| N3908 | Nerve growth factor receptor p75        | 0.90 | 0.90 | 0.80  | 0.90 | 0.88  | 0.92 |
| N4412 | Neurabin I                              | 1.37 | 1.32 | 1.64  | 1.87 | 1.89  | 1.82 |
| N5037 | Neurabin II                             | 1.23 | 1.25 | 1.39  | 1.23 | 1.63  | 1.52 |
| N5162 | NeurabinII                              | 1.11 | 1.05 | 1.18  | 0.95 | 1.51  | 1.50 |
| N3662 | Neurofibromin                           | 1.08 | 1.07 | 1.25  | 1.20 | 1.55  | 1.45 |
| N2787 | Neurofilament 160                       | 1.08 | 1.12 | 1.23  | 1.22 | 1.31  | 1.40 |
| N4142 | Neurofilament 200                       | 1.19 | 1.13 | 1.18  | 1.19 | 1.25  | 1.19 |
| N0142 | Neurofilament 200                       | 0.99 | 0.99 | 0.81  | 1.01 | 0.94  | 0.99 |
| N5389 | Neurofilament 200                       | 1.02 | 1.11 | 1.22  | 1.10 | 1.04  | 1.07 |
| N5139 | Neurofilament 68                        | 0.84 | 0.81 | 0.64  | 0.45 | 0.62  | 0.64 |
| N2912 | Neurofilament 160 200                   | 0.97 | 0.94 | 1.01  | 1.00 | 0.83  | 0.94 |
| N8523 | NFkB                                    | 1.00 | 0.86 | 1.07  | 0.49 | 0.59  | 0.42 |
| N2661 | NAK                                     | 1.02 | 0.91 | 0.71  | 0.08 | 0.28  | 0.37 |
| N8912 | NG2                                     | 1.05 | 0.78 | 0.68  | 0.15 | 0.10  | 0.25 |
| N1660 | Nicestrin                               | 1.07 | 1.06 | 1.23  | 1.18 | 1.08  | 1.14 |
| N2280 | Nitric Oxide Synthase bNOS              | 1.04 | 0.77 | 1.16  | 1.00 | 0.61  | 1.18 |
| N7155 | Nitric Oxide Synthase bNOS              | 1.08 | 1.09 | 1.36  | 1.22 | 1.51  | 1.18 |
| N9532 | Nitric Oxide Synthase Endothelial eNOS  | 0.84 | 0.81 | 0.70  | 0.65 | 0.66  | 0.71 |
| N3893 | Nitric Oxide Synthase Endothelial eNOS  | 1.01 | 1.70 | 1.26  | 1.12 | 1.08  | 1.08 |
| N2643 | Nitric Oxide Synthase Endothelial eNOS  | 1.01 | 1.02 | 1.19  | 1.07 | 1.05  | 1.10 |
| N7782 | Nitric Oxide Synthase Inducible iNOS    | 1.00 | 1.79 | 1.32  | 1.10 | 1.21  | 1.24 |
| N9657 | Nitric Oxide Synthase Inducible iNOS    | 1.00 | 0.86 | 0.87  | 0.67 | 0.79  | 0.90 |
| N6786 | Notch1                                  | 1.00 | 1.00 | 0.48  | 1.00 | 0.47  | 1.41 |
| N0409 | Nitrotyrosin                            | 1.00 | 1.00 | 0.82  | 0.79 | 0.75  | 0.91 |
| N9527 | NTF2                                    | 1.36 | 1.05 | 1.10  | 0.85 | 1.09  | 1.19 |
| N5287 | Nuf2                                    | 1.36 | 1.17 | 1.44  | 1.28 | 1.34  | 1.39 |
| O6264 | OGlcNAc Transferase                     | 1.00 | 1.07 | 1.00  | 1.00 | 1.01  | 1.69 |
| O0138 | OP18 Stathmin                           | 1.73 | 1.41 | 1.41  | 1.21 | 1.41  | 1.39 |
| O1136 | Ornithine Decarboxylase                 | 1.00 | 1.01 | 1.00  | 0.92 | 0.93  | 1.04 |
| P3118 | p115 TAP                                | 1.00 | 1.00 | 0.98  | 0.45 | 0.65  | 0.97 |
| P1870 | p120ctn                                 | 1.39 | 1.31 | 1.22  | 1.21 | 1.36  | 1.25 |
| C0354 | p130CAS                                 | 1.00 | 1.00 | 1.18  | 1.14 | 1.24  | 1.25 |
| P2610 | p14 arf                                 | 0.89 | 0.87 | 1.23  | 1.36 | 1.11  | 1.19 |
| P0968 | p16INK4a/CDKN2                          | 1.00 | 1.00 | 0.95  | 1.17 | 1.01  | 1.13 |
| P4354 | p19INK4d                                | 1.21 | 1.03 | 3.58  | 1.61 | 9.18  | 4.97 |
| P1484 | p21WAF1Cip1                             | 0.69 | 0.39 | 0.88  | 0.80 | 0.59  | 0.68 |
| P2859 | p300 CBP                                | 1.00 | 1.00 | 0.88  | 0.69 | 0.14  | 0.42 |
| C3085 | p34cdc2                                 | 1.57 | 0.84 | 0.63  | 0.48 | 0.28  | 0.39 |
| P9489 | p35 Cdk5 Regulator                      | 1.44 | 1.39 | 1.97  | 1.53 | 1.87  | 1.58 |
| M8432 | p38 MAP Kinase NonActivated             | 2.97 | 1.49 | 2.22  | 1.50 | 1.61  | 1.50 |
| M0800 | p38 MAPK                                | 1.23 | 1.21 | 1.71  | 1.37 | 1.25  | 1.26 |
| M8177 | p38 MAPK activated diphosphorylated p38 | 1.13 | 0.90 | 1.17  | 1.39 | 0.75  | 1.27 |
| P5813 | p53                                     | 0.98 | 0.93 | 1.04  | 0.77 | 0.40  | 0.64 |
| P6874 | P53                                     | 1.03 | 0.94 | 1.40  | 1.05 | 0.83  | 0.91 |
| P8982 | p53 pSer392                             | 1.00 | 1.00 | 1.00  | 1.00 | 1.00  | 1.00 |
| P4868 | p53DINP1SIP                             | 3.57 | 1.89 | 6.18  | 2.88 | 3.01  | 2.02 |
| P4993 | P53R2                                   | 1.55 | 9.32 | 14.98 | 1.20 | 11.77 | 3.96 |
| B4561 | P53 BP1                                 | 0.89 | 0.55 | 1.00  | 0.72 | 0.81  | 1.20 |
| B4436 | P53 BP1                                 | 0.76 | 0.78 | 0.53  | 0.43 | 0.97  | 1.32 |
| P2735 | p57kip2                                 | 1.45 | 1.92 | 1.97  | 1.55 | 2.77  | 2.49 |
| P3362 | p63                                     | 0.55 | 0.59 | 0.91  | 0.92 | 0.85  | 1.00 |
| P3737 | p63                                     | 1.00 | 1.52 | 1.54  | 1.46 | 1.76  | 1.60 |
| P6246 | PABP                                    | 1.01 | 0.90 | 0.63  | 0.73 | 0.88  | 0.90 |
| P4749 | PAD14                                   | 1.15 | 1.12 | 1.42  | 1.10 | 1.35  | 1.32 |
| P3237 | PAK1pThr212                             | 0.86 | 0.78 | 0.66  | 0.35 | 0.62  | 0.63 |
| P5367 | Par4 Prostate Apoptosis Response 4      | 1.45 | 1.49 | 1.48  | 1.30 | 1.36  | 1.25 |
| P5746 | gParvin                                 | 0.99 | 0.88 | 1.59  | 0.92 | 0.74  | 0.83 |
| P6248 | Parkin                                  | 2.98 | 2.17 | 2.08  | 1.73 | 2.05  | 1.72 |

|       |                                           |      |      |      |      |      |      |
|-------|-------------------------------------------|------|------|------|------|------|------|
| P7605 | PARP                                      | 0.89 | 0.83 | 0.72 | 0.75 | 0.77 | 0.81 |
| P1093 | Paxillin                                  | 0.95 | 0.89 | 0.64 | 0.46 | 0.73 | 0.68 |
| P7493 | PCAF                                      | 0.95 | 0.92 | 0.75 | 0.83 | 0.74 | 0.80 |
| P8825 | Proliferating Cell Nuclear Antigen        | 0.87 | 0.66 | 0.39 | 0.12 | 0.16 | 0.39 |
| P3110 | PDK1                                      | 0.93 | 0.89 | 0.92 | 0.90 | 1.12 | 1.06 |
| P5622 | Pen2                                      | 0.91 | 0.97 | 0.97 | 0.98 | 0.98 | 0.98 |
| P5117 | Peripherin                                | 0.95 | 0.89 | 0.79 | 0.90 | 0.92 | 0.93 |
| P1247 | Peroxiredoxin 3                           | 1.01 | 1.00 | 1.01 | 1.12 | 1.10 | 1.03 |
| P5243 | PERP                                      | 1.03 | 1.00 | 1.17 | 2.04 | 1.91 | 1.27 |
| P5242 | Phospholipase A2 group v                  | 0.88 | 0.88 | 0.84 | 0.90 | 0.97 | 0.94 |
| P5747 | Phosphoserine                             | 1.26 | 1.23 | 1.45 | 1.23 | 1.58 | 1.45 |
| P6623 | Phosphothreonine                          | 1.52 | 1.44 | 1.68 | 1.54 | 1.82 | 1.61 |
| P1869 | Phosphotyrosine                           | 1.06 | 1.05 | 1.00 | 0.97 | 1.18 | 1.13 |
| P8104 | Phospholipase C g1                        | 0.83 | 0.88 | 0.88 | 1.07 | 1.01 | 0.94 |
| P1495 | Phosphatidylserine Receptor               | 0.90 | 0.90 | 0.76 | 0.85 | 0.86 | 0.84 |
| P9498 | PIASx                                     | 1.19 | 1.04 | 0.87 | 0.88 | 0.96 | 0.89 |
| P5118 | PID MTA2                                  | 1.00 | 1.00 | 0.72 | 1.00 | 2.48 | 4.13 |
| P9371 | PINCH1                                    | 1.13 | 1.11 | 1.28 | 1.11 | 1.22 | 1.19 |
| P2482 | Protein Kinase Ba                         | 0.85 | 0.86 | 0.92 | 0.88 | 0.89 | 0.89 |
| P1601 | Protein Kinase Ba                         | 1.64 | 1.34 | 1.18 | 1.11 | 1.12 | 1.04 |
| P4112 | PKB pSer473                               | 1.11 | 1.05 | 1.19 | 1.09 | 0.97 | 0.90 |
| P3862 | PKB pThr308                               | 1.00 | 1.06 | 1.06 | 1.16 | 0.92 | 0.98 |
| P5704 | Protein Kinase C PKC                      | 1.15 | 1.05 | 0.93 | 0.87 | 0.74 | 0.75 |
| P4334 | Protein Kinase □ Ca                       | 0.87 | 0.83 | 0.72 | 0.77 | 0.75 | 0.79 |
| P3078 | Protein Kinase □ Cb1                      | 0.75 | 0.90 | 0.71 | 0.96 | 0.63 | 0.58 |
| P6959 | Protein Kinase □ Cb1                      | 0.99 | 0.91 | 0.99 | 0.89 | 1.03 | 0.93 |
| P3203 | Protein Kinase □ Cb2                      | 0.81 | 0.90 | 0.78 | 1.12 | 0.85 | 0.86 |
| P2584 | Protein Kinase □ Cb2                      | 0.84 | 0.82 | 1.27 | 1.09 | 0.69 | 0.66 |
| P8083 | Protein Kinase Cg                         | 1.07 | 1.02 | 1.05 | 1.38 | 1.13 | 1.12 |
| P8333 | Protein Kinase □ Cd                       | 0.91 | 0.92 | 0.75 | 0.91 | 0.88 | 0.86 |
| P8458 | Protein Kinase □ Ce                       | 0.86 | 0.91 | 0.77 | 0.82 | 0.86 | 0.88 |
| P0713 | Protein Kinase □ C                        | 0.93 | 0.94 | 0.77 | 0.75 | 0.86 | 0.88 |
| P8090 | Protein Kinase □ C                        | 0.70 | 0.83 | 0.78 | 0.89 | 0.91 | 0.90 |
| P3987 | Protein Kinase D                          | 1.10 | 1.16 | 1.14 | 1.26 | 1.32 | 1.23 |
| P0244 | PKR                                       | 1.30 | 1.28 | 1.22 | 1.27 | 1.33 | 1.23 |
| P8087 | Plakoglobin Catenin g                     | 1.38 | 1.35 | 1.41 | 1.44 | 1.58 | 1.43 |
| P7679 | Platelet-Derived Growth Factor Receptor b | 0.49 | 1.50 | 0.63 | 0.72 | 1.59 | 1.13 |
| P9318 | Plectin                                   | 0.93 | 0.96 | 0.89 | 0.83 | 0.94 | 1.03 |
| P6746 | PML                                       | 1.10 | 1.09 | 0.86 | 0.96 | 1.00 | 0.97 |
| P7854 | Presenilin1                               | 1.16 | 1.22 | 1.27 | 1.23 | 1.20 | 1.10 |
| P5999 | Prion Protein                             | 1.03 | 1.06 | 0.90 | 1.42 | 1.49 | 1.38 |
| P6871 | PRMT1                                     | 0.63 | 1.07 | 1.01 | 1.74 | 1.52 | 1.43 |
| P6996 | PRMT1                                     | 0.80 | 1.02 | 0.82 | 1.07 | 1.08 | 1.07 |
| P0748 | PRMT2                                     | 1.03 | 1.28 | 1.03 | 1.33 | 1.09 | 1.48 |
| P9370 | PRMT3                                     | 1.00 | 1.10 | 1.03 | 1.17 | 0.92 | 0.94 |
| P4995 | PRMT4                                     | 0.96 | 0.93 | 0.85 | 0.89 | 0.80 | 0.86 |
| P0493 | PRMT5                                     | 1.06 | 0.88 | 1.28 | 1.06 | 0.90 | 0.94 |
| P6495 | PRMT6                                     | 0.96 | 0.94 | 0.82 | 0.87 | 0.77 | 0.81 |
| P2996 | PRMT6                                     | 0.89 | 0.90 | 1.06 | 1.16 | 1.17 | 1.01 |
| P6834 | Proliferating Cell Protein Ki67           | 0.79 | 0.77 | 0.58 | 0.54 | 0.52 | 0.56 |
| P7979 | Protein phosphatase 1a                    | 1.05 | 1.05 | 1.39 | 1.23 | 1.20 | 1.17 |
| P7607 | Protein Phosphatase 1a                    | 0.94 | 0.98 | 0.69 | 0.63 | 0.82 | 0.82 |
| P8998 | Protein Phosphatase 2Aa                   | 0.81 | 0.92 | 0.81 | 0.81 | 0.81 | 0.88 |
| P4555 | Protein S                                 | 1.01 | 1.00 | 1.08 | 0.92 | 1.05 | 1.02 |
| P9109 | Protein Tyrosine Phosphatase PEST         | 0.34 | 0.48 | 0.65 | 0.34 | 0.71 | 0.82 |
| P2860 | PSF                                       | 0.83 | 0.80 | 0.67 | 0.61 | 0.81 | 0.82 |
| P7482 | PTEN                                      | 1.17 | 1.18 | 1.26 | 1.12 | 1.31 | 1.22 |
| P3487 | PTEN                                      | 1.00 | 1.03 | 0.99 | 1.00 | 1.09 | 1.12 |
| P4618 | PUMA bbc3                                 | 1.09 | 1.14 | 1.27 | 1.64 | 1.59 | 1.20 |

|       |                                                |      |      |      |      |      |      |
|-------|------------------------------------------------|------|------|------|------|------|------|
| P4743 | PUMA bbc3                                      | 1.18 | 1.21 | 1.29 | 1.47 | 1.67 | 1.40 |
| P3902 | Pyk2                                           | 1.00 | 0.65 | 0.79 | 0.85 | 0.97 | 0.95 |
| P7114 | Pyk2 pTyr579                                   | 1.00 | 0.88 | 0.97 | 1.00 | 1.15 | 1.40 |
| P6989 | Pyk2 Phospho pTyr579 580                       | 0.47 | 0.85 | 0.52 | 0.76 | 0.66 | 1.00 |
| P6739 | Pyk2 pTyr580                                   | 1.00 | 1.02 | 1.16 | 1.82 | 0.93 | 0.87 |
| R7904 | Rab5                                           | 2.05 | 3.13 | 1.67 | 1.51 | 1.96 | 1.82 |
| R8779 | Rab7                                           | 1.00 | 0.84 | 1.25 | 0.49 | 1.55 | 1.68 |
| R5404 | Rab9                                           | 1.00 | 0.33 | 0.77 | 0.68 | 0.85 | 0.91 |
| R5029 | RAD1                                           | 1.00 | 1.19 | 1.04 | 1.14 | 1.08 | 1.08 |
| R8029 | Rad17                                          | 0.67 | 0.90 | 0.95 | 0.75 | 1.08 | 1.01 |
| R2404 | Raf1cRaf                                       | 1.00 | 0.93 | 1.20 | 1.15 | 1.01 | 1.04 |
| R5773 | Raf1                                           | 0.85 | 0.24 | 1.16 | 1.10 | 1.20 | 1.16 |
| R1151 | cRaf pSer621                                   | 0.71 | 0.64 | 0.71 | 1.12 | 0.87 | 0.83 |
| R9775 | RAIDD                                          | 1.00 | 0.77 | 1.31 | 1.74 | 1.88 | 1.55 |
| R5275 | RAIDD                                          | 1.06 | 1.25 | 1.57 | 1.90 | 1.96 | 1.56 |
| R8529 | RALAR                                          | 0.94 | 0.84 | 0.59 | 0.35 | 0.79 | 0.80 |
| R4777 | Ran                                            | 1.02 | 1.07 | 1.32 | 1.24 | 1.63 | 1.62 |
| P0104 | PIASy                                          | 0.92 | 0.87 | 0.76 | 0.78 | 1.05 | 1.06 |
| R8154 | RAP1                                           | 0.88 | 0.86 | 0.79 | 0.79 | 1.06 | 1.12 |
| R3779 | RbAp48 RbAp46                                  | 1.06 | 1.10 | 1.19 | 1.15 | 1.42 | 1.35 |
| R4904 | Reelin                                         | 0.34 | 0.68 | 0.75 | 0.79 | 0.82 | 0.82 |
| R6775 | Retinoblastoma                                 | 1.11 | 0.99 | 1.20 | 1.19 | 1.36 | 1.31 |
| R6878 | Retinoblastoma pSer795                         | 0.73 | 1.09 | 0.95 | 0.89 | 1.64 | 1.42 |
| R6153 | RhoE                                           | 0.39 | 0.62 | 0.80 | 0.93 | 1.42 | 1.25 |
| R9650 | RICK                                           | 0.79 | 0.76 | 1.15 | 1.48 | 1.53 | 1.31 |
| R8274 | RIP Receptor Interacting Protein               | 0.32 | 0.77 | 0.71 | 0.75 | 0.80 | 0.87 |
| R3529 | RNaseL                                         | 1.07 | 1.08 | 1.31 | 1.28 | 1.49 | 1.38 |
| R6028 | ROCK1                                          | 1.01 | 0.49 | 1.31 | 1.16 | 1.44 | 1.23 |
| R8653 | ROCK2                                          | 0.38 | 0.29 | 1.13 | 1.28 | 1.49 | 1.26 |
| R5145 | Rsk1                                           | 0.84 | 0.93 | 0.92 | 1.00 | 0.97 | 0.96 |
| S2644 | S100                                           | 0.96 | 1.10 | 1.41 | 1.37 | 1.47 | 1.26 |
| S2407 | S100 aSubunit                                  | 0.95 | 0.91 | 1.04 | 0.99 | 1.23 | 1.23 |
| S2532 | S100 bSubunit                                  | 1.07 | 1.03 | 1.30 | 1.22 | 1.14 | 1.18 |
| N5411 | S Nitrosocysteine                              | 1.05 | 1.07 | 1.45 | 1.40 | 1.47 | 1.36 |
| S4047 | S6 Kinase                                      | 0.86 | 0.87 | 0.76 | 0.87 | 0.91 | 0.94 |
| S0315 | SAPK3                                          | 0.88 | 1.18 | 1.03 | 1.43 | 1.62 | 1.26 |
| S3396 | Spectrin a and b                               | 0.90 | 1.00 | 0.88 | 0.90 | 1.05 | 1.12 |
| P8109 | Serine Threonine Protein Phosphatase 2 A/A     | 0.98 | 0.88 | 0.75 | 0.76 | 1.20 | 1.19 |
| P7484 | Serine Threonine Protein Phosphatase 1b        | 0.89 | 0.91 | 0.68 | 1.03 | 1.17 | 1.03 |
| P7609 | Serine Threonine Protein Phosphatase 1g1       | 0.80 | 0.80 | 0.74 | 0.77 | 1.06 | 0.94 |
| P5359 | Serine Threonine Protein Phosphatase 2 A/Bg    | 0.62 | 0.86 | 0.68 | 0.80 | 0.98 | 1.00 |
| P8359 | SerineThreonine Protein Phosphatase 2 A/B pan2 | 0.84 | 0.82 | 0.66 | 1.14 | 1.21 | 1.04 |
| P8609 | Serine Threonine Protein Phosphatase 2C a b    | 0.84 | 0.95 | 0.75 | 0.71 | 0.94 | 0.99 |
| S5188 | SGK                                            | 1.00 | 1.09 | 1.09 | 1.16 | 1.33 | 1.19 |
| S3056 | SHPTP2                                         | 0.96 | 1.22 | 1.47 | 1.39 | 1.60 | 1.36 |
| S7945 | Siah2                                          | 0.96 | 1.10 | 1.32 | 1.51 | 2.03 | 1.63 |
| S4445 | Sin3A                                          | 0.93 | 1.11 | 1.20 | 1.32 | 1.53 | 1.38 |
| S6695 | Sin3A                                          | 0.91 | 1.06 | 1.08 | 1.09 | 1.37 | 1.22 |
| S5313 | Sir2                                           | 0.89 | 0.96 | 0.81 | 1.04 | 0.95 | 0.89 |
| S1311 | SIRPa1                                         | 0.28 | 0.86 | 0.93 | 1.28 | 0.87 | 0.79 |
| S5196 | Sirt1                                          | 1.08 | 1.15 | 1.41 | 1.33 | 1.42 | 1.26 |
| S9568 | SKM1                                           | 0.97 | 0.97 | 0.85 | 0.80 | 0.87 | 0.85 |
| S5308 | SKK2                                           | 0.32 | 0.97 | 0.87 | 0.83 | 0.28 | 0.37 |
| S1190 | SLIPR MAGI3                                    | 0.94 | 0.91 | 0.74 | 0.79 | 0.73 | 0.80 |
| S4191 | SLIPR MAGI3                                    | 0.98 | 0.92 | 0.72 | 0.70 | 0.59 | 0.58 |
| S3934 | Smad4                                          | 0.94 | 0.94 | 0.57 | 0.61 | 0.59 | 0.66 |
| S6446 | SMC1L1                                         | 1.03 | 1.03 | 0.99 | 1.10 | 1.09 | 1.07 |
| S2944 | SMN                                            | 1.02 | 1.01 | 0.90 | 0.86 | 0.77 | 0.86 |
| S9444 | a b SNAP                                       | 1.05 | 1.07 | 1.10 | 1.16 | 1.09 | 1.09 |

|       |                                           |      |      |      |      |      |      |
|-------|-------------------------------------------|------|------|------|------|------|------|
| S2194 | SNAP23                                    | 1.01 | 1.04 | 1.07 | 1.23 | 1.09 | 1.05 |
| S9684 | SNAP25                                    | 1.09 | 1.10 | 1.06 | 1.15 | 1.10 | 1.08 |
| S2069 | SNAP29                                    | 1.07 | 1.09 | 1.07 | 1.16 | 1.04 | 1.04 |
| S2937 | Sos1                                      | 1.06 | 1.08 | 0.98 | 1.09 | 1.02 | 1.02 |
| S9809 | Sp1                                       | 0.70 | 0.81 | 0.77 | 0.90 | 0.88 | 0.86 |
| S7320 | Spred2                                    | 1.04 | 0.98 | 0.74 | 0.73 | 0.89 | 0.98 |
| S0696 | Striatin                                  | 1.24 | 1.44 | 1.33 | 1.37 | 1.75 | 1.66 |
| S8305 | Substance P Receptor                      | 1.13 | 1.13 | 1.02 | 1.07 | 1.11 | 1.08 |
| S0941 | SMAC Diablo                               | 1.42 | 1.57 | 1.37 | 1.40 | 1.74 | 1.49 |
| S8070 | SUMO1                                     | 0.89 | 1.03 | 0.90 | 0.95 | 1.27 | 1.22 |
| S5446 | SUMO1                                     | 0.91 | 0.98 | 0.78 | 0.96 | 0.92 | 0.93 |
| S8191 | Survivin                                  | 1.60 | 1.60 | 1.04 | 1.16 | 1.27 | 1.23 |
| S2177 | Synaptotagmin                             | 0.84 | 1.13 | 1.21 | 1.20 | 1.36 | 1.27 |
| S9442 | Synaptopodin                              | 0.96 | 1.20 | 1.32 | 1.31 | 1.45 | 1.33 |
| S9567 | Synaptopodin                              | 0.99 | 1.15 | 1.29 | 1.37 | 1.27 | 1.21 |
| S4945 | SynCAM                                    | 1.00 | 1.00 | 0.92 | 0.94 | 1.27 | 0.95 |
| S4688 | a1Syntrophin                              | 1.02 | 1.02 | 1.09 | 1.11 | 1.09 | 1.05 |
| S4813 | a1 Syntrophin                             | 1.01 | 1.04 | 1.13 | 1.15 | 1.17 | 1.17 |
| S0664 | Syntaxin                                  | 1.04 | 1.03 | 1.30 | 1.31 | 1.13 | 1.19 |
| S9067 | Syntaxin 6                                | 1.07 | 1.01 | 0.84 | 0.56 | 0.73 | 0.69 |
| S8945 | Syntaxin 8                                | 1.07 | 1.19 | 1.55 | 1.38 | 1.16 | 1.18 |
| S3062 | aSynuclein                                | 1.09 | 1.14 | 1.39 | 1.29 | 1.36 | 1.29 |
| T1075 | Tal                                       | 0.91 | 0.92 | 0.63 | 0.39 | 0.80 | 0.85 |
| T1200 | Tal                                       | 0.88 | 0.99 | 0.91 | 1.06 | 1.08 | 1.00 |
| T1076 | TAP                                       | 0.93 | 0.93 | 0.87 | 1.13 | 0.93 | 0.92 |
| T9450 | Tau                                       | 0.94 | 1.03 | 1.45 | 1.32 | 1.48 | 1.43 |
| T6819 | Tau pSer199 202                           | 0.75 | 1.44 | 1.10 | 0.51 | 0.97 | 0.37 |
| T5530 | Tau                                       | 0.64 | 0.43 | 0.25 | 0.08 | 0.20 | 0.28 |
| T2551 | Tenascin                                  | 0.96 | 0.99 | 0.74 | 0.65 | 0.91 | 0.93 |
| T7076 | Thimet Oligopeptidase 1                   | 0.88 | 0.89 | 0.67 | 0.45 | 0.76 | 0.84 |
| T2576 | TIS7                                      | 0.86 | 0.81 | 0.89 | 0.90 | 1.21 | 1.09 |
| T1815 | Tumor Necrosis Factor Soluble Receptor□□□ | 0.76 | 0.83 | 0.54 | 0.37 | 1.20 | 1.03 |
| T2948 | Tob                                       | 0.91 | 0.96 | 0.82 | 0.87 | 1.03 | 1.03 |
| T6319 | TOM22                                     | 0.92 | 0.97 | 0.76 | 0.86 | 0.83 | 0.84 |
| T8573 | TopoisomeraseI                            | 0.71 | 0.51 | 0.57 | 0.38 | 0.72 | 0.82 |
| T3067 | TRAIL                                     | 0.41 | 0.75 | 0.60 | 1.42 | 1.19 | 1.00 |
| T9191 | TRAIL                                     | 0.79 | 1.30 | 1.37 | 1.75 | 1.67 | 1.51 |
| T9429 | Transforming Growth Factorb pan           | 0.88 | 0.94 | 0.83 | 0.87 | 1.06 | 0.98 |
| T0825 | Transportin 1                             | 0.94 | 0.95 | 0.79 | 0.88 | 0.78 | 0.84 |
| T1948 | TRF1                                      | 0.97 | 0.93 | 0.70 | 0.80 | 0.73 | 0.78 |
| T2780 | Tropomyosin                               | 0.96 | 0.90 | 0.96 | 0.89 | 0.81 | 0.87 |
| T9283 | Tropomyosin                               | 0.97 | 0.89 | 0.57 | 0.54 | 0.93 | 0.93 |
| T0678 | Tryptophane Hydroxylase                   | 0.91 | 0.90 | 0.78 | 0.70 | 0.66 | 0.72 |
| T5826 | TSG101                                    | 0.82 | 0.98 | 0.82 | 0.92 | 0.94 | 0.98 |
| T6074 | aTubulin                                  | 0.98 | 0.91 | 0.84 | 0.84 | 0.81 | 0.83 |
| T6199 | aTubulin                                  | 0.99 | 0.97 | 0.87 | 0.98 | 0.90 | 0.95 |
| T5201 | bTubulin                                  | 0.81 | 1.07 | 0.86 | 1.01 | 1.16 | 1.08 |
| T7816 | bTubulin I                                | 0.99 | 1.09 | 1.11 | 1.17 | 1.35 | 1.24 |
| T8535 | bTubulin I II                             | 0.93 | 0.96 | 1.02 | 0.95 | 1.15 | 1.11 |
| T5076 | bTubulin III                              | 1.05 | 1.03 | 0.99 | 0.99 | 0.97 | 0.99 |
| T7941 | bTubulin IV                               | 1.07 | 1.11 | 1.21 | 1.17 | 1.31 | 1.24 |
| T5326 | gTubulin                                  | 0.88 | 0.87 | 0.76 | 0.82 | 0.95 | 0.97 |
| T3559 | gTubulin                                  | 1.38 | 1.33 | 1.06 | 1.06 | 1.14 | 1.09 |
| T3320 | gTubulin                                  | 0.99 | 1.04 | 0.89 | 0.98 | 1.18 | 1.13 |
| T1323 | e Tubulin                                 | 1.30 | 1.56 | 1.58 | 1.57 | 1.88 | 1.59 |
| T9822 | Tubulin Polyglutamylated                  | 0.97 | 1.05 | 0.92 | 0.92 | 1.15 | 1.09 |
| T9028 | Tubulin Tyrosine                          | 0.99 | 0.96 | 1.00 | 0.93 | 0.99 | 1.00 |
| T8300 | Tumor Necrosis Factor a                   | 0.99 | 1.03 | 1.01 | 1.05 | 1.19 | 1.08 |
| T2824 | Tumor Necrosis Factor a                   | 0.75 | 1.04 | 1.65 | 1.63 | 1.68 | 1.57 |

|       |                                                     |      |      |      |      |      |      |
|-------|-----------------------------------------------------|------|------|------|------|------|------|
| N3038 | Nanog                                               | 0.76 | 0.99 | 0.75 | 0.84 | 1.11 | 1.15 |
| T9700 | TWEAK Receptor                                      | 0.71 | 1.00 | 1.39 | 1.52 | 1.81 | 1.47 |
| T2928 | Tyrosin hydroxylase                                 | 0.85 | 0.95 | 0.74 | 0.66 | 0.68 | 0.74 |
| U4758 | U2AF65                                              | 0.95 | 0.99 | 1.24 | 1.19 | 1.55 | 1.41 |
| U0508 | Ubiquitin                                           | 0.86 | 0.77 | 0.66 | 0.71 | 0.68 | 0.79 |
| U5133 | Ubiquitin C terminal Hydrolase L1                   | 1.04 | 1.08 | 1.14 | 1.19 | 1.29 | 1.14 |
| U5258 | Ubiquitin Cterminal Hydrolase L1                    | 1.28 | 1.39 | 1.20 | 1.17 | 1.50 | 1.31 |
| P0084 | Pinin                                               | 0.77 | 0.87 | 0.43 | 0.21 | 0.63 | 0.45 |
| V2764 | Vanilloid Receptor1                                 | 0.99 | 1.04 | 1.04 | 1.12 | 1.11 | 1.02 |
| V2139 | VDAC Porin                                          | 0.76 | 0.98 | 1.22 | 1.24 | 1.29 | 1.21 |
| V4762 | Vascular Endothelial Growth Factor Receptor1VEGFR1□ | 0.89 | 0.95 | 0.74 | 0.69 | 0.74 | 0.82 |
| V5764 | Vesicular GABA Transporter                          | 0.98 | 1.02 | 0.96 | 0.99 | 1.13 | 1.05 |
| V0389 | VGLUT1                                              | 0.96 | 1.10 | 1.13 | 1.09 | 1.12 | 1.05 |
| V2639 | VGLUT 2                                             | 0.96 | 1.17 | 1.10 | 1.16 | 1.22 | 1.11 |
| V6389 | Vimentin                                            | 0.82 | 0.83 | 0.77 | 0.86 | 0.96 | 0.96 |
| V4505 | Vinculin                                            | 0.89 | 0.97 | 0.70 | 0.35 | 1.03 | 1.03 |
| V7881 | Vitronectin                                         | 0.86 | 0.83 | 0.65 | 0.65 | 0.77 | 0.77 |
| W0392 | WAVE                                                | 0.99 | 1.33 | 1.12 | 1.27 | 1.64 | 1.33 |
| W3516 | WSTF                                                | 0.94 | 1.22 | 0.98 | 1.16 | 1.44 | 1.23 |
| Y1253 | Y14                                                 | 0.82 | 1.19 | 1.14 | 1.14 | 1.39 | 1.25 |
| Z0627 | ZAP70                                               | 0.85 | 1.03 | 0.86 | 0.74 | 1.02 | 1.03 |
| Z0134 | Zip Kinase                                          | 0.52 | 0.77 | 0.75 | 1.18 | 1.35 | 1.12 |
| Z0377 | Zyxin                                               | 0.72 | 1.06 | 1.40 | 1.62 | 1.66 | 1.45 |

Net intensity ratio indicates a ratio of intensity (means) in an irradiated sample to that in a control sample
