# Supplementary material for: Differences in sustained alterations in protein expression between livers of mice exposed to high-dose-rate and low-dose-rate radiation
Source: PubMed Central journal article supplement — J Radiat Res. 2017 Feb 15;58(4):421–9. doi: 10.1093/jrr/rrw133 (PMC5570048; doi:10.1093/jrr/rrw133), 2017-02-15
Supplement: supplementary_table2r.pdf [file supplementary_table2r.pdf]

Supplementary Table 2

|          |                                      | 8Gy ( immediately after chronic irradiation) |                     |                     | 8Gy ( 3 months after chronic irradiation) |                     |                     |
|----------|--------------------------------------|----------------------------------------------|---------------------|---------------------|-------------------------------------------|---------------------|---------------------|
| Sigma No | Name                                 | Net intensity ratio                          | Net intensity ratio | Net intensity ratio | Net intensity ratio                       | Net intensity ratio | Net intensity ratio |
|          |                                      | Comparison 1                                 | Comparison 2        | Comparison 3        | Comparison 1                              | Comparison 2        | Comparison 3        |
| T5942    | 14 3 3                               | 0.43                                         | 0.54                | 0.38                | 0.74                                      | 0.40                | 0.46                |
| A5463    | Acetylated Protein                   | 0.65                                         | 0.74                | 0.70                | 0.79                                      | 0.73                | 0.69                |
| A5060    | Actin                                | 0.73                                         | 0.83                | 0.77                | 0.86                                      | 0.86                | 0.76                |
| A3853    | Actin                                | 0.92                                         | 1.02                | 0.86                | 0.99                                      | 0.94                | 0.89                |
| A5228    | Actin a-Smooth Muscle                | 0.63                                         | 0.74                | 0.74                | 0.77                                      | 0.71                | 0.72                |
| A1978    | bActin                               | 0.74                                         | 0.83                | 0.75                | 0.91                                      | 0.83                | 0.72                |
| A2228    | bActin                               | 0.81                                         | 0.94                | 0.84                | 0.92                                      | 0.92                | 0.66                |
| A5044    | aActinin                             | 0.82                                         | 0.88                | 0.96                | 0.90                                      | 1.02                | 0.74                |
| A1226    | Actopaxin                            | 0.73                                         | 0.83                | 0.75                | 0.87                                      | 0.84                | 0.69                |
| A7107    | AP2                                  | 0.66                                         | 0.79                | 0.66                | 0.69                                      | 0.73                | 0.57                |
| A4450    | b1 and b2 Adaptins                   | 1.06                                         | 1.09                | 0.88                | 0.97                                      | 0.99                | 0.82                |
| A0349    | IAfadin                              | 0.89                                         | 0.98                | 0.86                | 0.90                                      | 0.94                | 0.81                |
| A8975    | AFX                                  | 0.83                                         | 0.90                | 0.80                | 0.84                                      | 0.88                | 0.76                |
| A5854    | AFX                                  | 0.80                                         | 0.92                | 0.75                | 0.88                                      | 0.92                | 0.70                |
| A6229    | AKR1C3                               | 0.80                                         | 0.92                | 0.73                | 0.86                                      | 0.88                | 0.66                |
| A9979    | Aly                                  | 0.88                                         | 1.02                | 0.76                | 0.89                                      | 0.96                | 0.67                |
| A8354    | bAmyloid                             | 0.75                                         | 0.85                | 0.71                | 0.78                                      | 0.84                | 0.59                |
| A8717    | Amyloid Precursor Protein            | 0.74                                         | 0.82                | 0.75                | 0.88                                      | 0.87                | 0.68                |
| A8967    | Amyloid Precursor Protein            | 0.86                                         | 0.93                | 0.87                | 0.97                                      | 0.95                | 0.75                |
| A8842    | Amyloid Precursor Protein KPI Domain | 0.96                                         | 0.99                | 0.93                | 1.03                                      | 1.08                | 0.84                |
| A9853    | Androgen Receptor                    | 0.61                                         | 0.77                | 0.55                | 0.61                                      | 0.81                | 0.38                |
| A8604    | Annexin V                            | 0.87                                         | 0.93                | 0.76                | 0.83                                      | 0.92                | 0.62                |
| A4475    | Annexin VII                          | 0.87                                         | 0.93                | 0.83                | 0.94                                      | 0.91                | 0.78                |
| C0992    | Anti CY3/5                           | 2.65                                         | 2.99                | 3.29                | 5.98                                      | 4.56                | 4.16                |
| A7674    | AOP1                                 | 0.81                                         | 0.88                | 0.73                | 1.07                                      | 0.82                | 0.98                |
| A5968    | AP1                                  | 1.05                                         | 1.05                | 0.95                | 0.97                                      | 1.02                | 1.09                |
| A0844    | AP2a                                 | 1.07                                         | 1.09                | 0.90                | 0.89                                      | 0.95                | 0.99                |
| A2105    | AP Endonuclease                      | 1.03                                         | 1.79                | 0.82                | 0.83                                      | 0.90                | 0.90                |
| A8469    | Apa1                                 | 0.97                                         | 0.87                | 0.37                | 0.38                                      | 0.37                | 0.27                |
| A7549    | Apoptosis Inducing Factor            | 1.12                                         | 1.24                | 0.88                | 0.93                                      | 1.01                | 0.85                |
| A1726    | APRIL                                | 0.85                                         | 0.99                | 0.28                | 0.26                                      | 0.25                | 0.19                |
| A1851    | APRIL                                | 1.46                                         | 3.82                | 0.31                | 0.34                                      | 0.37                | 0.26                |
| A8344    | ARC                                  | 0.95                                         | 0.99                | 0.40                | 0.50                                      | 0.49                | 0.32                |
| A4721    | ARNO                                 | 1.50                                         | 1.59                | 0.89                | 1.06                                      | 1.16                | 0.92                |
| A5601    | Arp1a Centractin                     | 1.36                                         | 1.35                | 0.94                | 1.09                                      | 1.14                | 1.00                |
| A6104    | ARP2                                 | 1.66                                         | 2.17                | 0.87                | 0.96                                      | 1.19                | 0.99                |
| A5979    | ARP3                                 | 0.94                                         | 0.97                | 0.62                | 0.86                                      | 0.85                | 0.70                |
| A3720    | ARTS                                 | 1.12                                         | 1.14                | 0.88                | 1.05                                      | 1.04                | 0.91                |
| A4471    | ARTS                                 | 1.35                                         | 1.37                | 0.73                | 0.82                                      | 0.96                | 0.80                |
| A4227    | ASAP1 Centaurin b4                   | 1.11                                         | 1.21                | 0.85                | 0.94                                      | 1.04                | 0.87                |
| A5355    | ASC2                                 | 0.96                                         | 0.96                | 0.78                | 0.79                                      | 0.94                | 0.84                |
| A4355    | ASPP1                                | 1.37                                         | 1.30                | 0.91                | 1.00                                      | 1.26                | 0.94                |
| A4480    | ASPP2                                | 1.59                                         | 1.89                | 0.89                | 0.93                                      | 1.25                | 0.84                |
| A7833    | ATF1                                 | 1.20                                         | 1.25                | 0.92                | 0.89                                      | 1.04                | 0.82                |
| A4086    | ATF2                                 | 1.16                                         | 1.11                | 1.00                | 1.02                                      | 1.19                | 0.93                |
| A4095    | ATF2 pThr69 71                       | 1.14                                         | 1.12                | 0.96                | 1.04                                      | 1.13                | 0.95                |
| A6093    | ATM                                  | 2.20                                         | 1.84                | 1.03                | 1.09                                      | 1.41                | 1.01                |
| A6218    | ATM                                  | 0.92                                         | 1.10                | 0.84                | 0.84                                      | 0.76                | 0.87                |
| A5102    | AuroraB                              | 0.84                                         | 0.92                | 0.87                | 0.95                                      | 0.80                | 0.86                |
| B0806    | BACE 1                               | 0.99                                         | 1.03                | 0.93                | 0.86                                      | 0.88                | 1.00                |
| B1310    | BACH1                                | 0.71                                         | 0.90                | 0.70                | 0.67                                      | 0.60                | 0.64                |
| B0559    | BAD                                  | 1.38                                         | 2.33                | 0.68                | 0.72                                      | 0.73                | 0.72                |
| B0436    | BAF57                                | 1.07                                         | 2.12                | 0.88                | 0.80                                      | 0.73                | 0.78                |

|       |                            |       |       |      |      |      |      |
|-------|----------------------------|-------|-------|------|------|------|------|
| B5897 | BAK                        | 1.00  | 1.03  | 1.02 | 1.05 | 0.93 | 1.01 |
| B9303 | BAP1                       | 0.97  | 1.05  | 0.96 | 0.91 | 0.89 | 0.97 |
| B3428 | Bax                        | 0.93  | 1.05  | 0.84 | 0.89 | 0.87 | 0.85 |
| B8429 | Bax                        | 1.07  | 1.11  | 0.92 | 0.89 | 0.84 | 0.92 |
| B8554 | Bax                        | 1.19  | 1.23  | 1.15 | 1.04 | 1.04 | 1.22 |
| B9054 | Bax                        | 1.06  | 1.06  | 0.98 | 0.95 | 0.86 | 0.99 |
| B7806 | Bcl10                      | 1.17  | 1.20  | 0.78 | 0.82 | 1.02 | 0.85 |
| P0110 | Prion protein              | 1.00  | 1.13  | 0.86 | 0.89 | 0.90 | 0.88 |
| B0431 | Bcl10                      | 0.91  | 0.97  | 0.93 | 0.97 | 0.87 | 0.91 |
| S4697 | Seladin                    | 0.82  | 0.87  | 0.86 | 0.87 | 0.80 | 0.88 |
| B9804 | Bcl2                       | 1.40  | 1.35  | 0.87 | 0.91 | 1.58 | 0.88 |
| B3170 | Bcl2                       | 0.99  | 1.03  | 1.03 | 0.96 | 1.03 | 1.04 |
| B9304 | Bclx                       | 0.78  | 0.87  | 0.80 | 0.82 | 0.75 | 0.75 |
| B9429 | BclxL                      | 0.75  | 0.84  | 0.75 | 0.84 | 0.75 | 0.82 |
| B4305 | BID                        | 1.01  | 1.03  | 0.96 | 0.93 | 1.08 | 0.87 |
| B3183 | BID                        | 0.22  | 0.32  | 0.27 | 0.32 | 0.35 | 0.27 |
| B7929 | Bim                        | 0.34  | 0.47  | 0.43 | 0.38 | 0.40 | 0.27 |
| C6118 | CDK5                       | 0.88  | 0.92  | 0.79 | 0.95 | 0.73 | 0.94 |
| B1684 | Bmf                        | 0.51  | 0.62  | 0.36 | 0.55 | 0.41 | 0.41 |
| B1559 | Bmf                        | 0.36  | 0.41  | 0.24 | 0.38 | 0.35 | 0.27 |
| B7931 | BNIP3                      | 1.03  | 1.15  | 0.77 | 0.87 | 0.80 | 0.84 |
| B7810 | BOB1 OBF1                  | 1.12  | 1.02  | 0.81 | 0.92 | 0.81 | 0.91 |
| B8184 | Brg1 hSNF2b                | 1.13  | 1.06  | 0.98 | 1.10 | 0.96 | 0.99 |
| B0811 | BTk                        | 1.14  | 1.05  | 0.93 | 1.00 | 0.97 | 0.94 |
| B0686 | BTk                        | 0.96  | 1.12  | 0.66 | 0.69 | 0.72 | 0.78 |
| B0561 | BUB1                       | 1.18  | 1.29  | 0.93 | 0.95 | 0.91 | 1.04 |
| B9310 | BUBR1                      | 1.09  | 1.00  | 0.73 | 0.76 | 0.70 | 0.82 |
| A5844 | cAb1                       | 1.17  | 1.45  | 0.92 | 1.01 | 0.96 | 1.01 |
| C9603 | cCbl                       | 1.06  | 1.12  | 0.90 | 1.02 | 0.96 | 1.01 |
| E2777 | cerbB2                     | 1.32  | 1.59  | 1.04 | 1.12 | 1.14 | 1.13 |
| E8767 | cerbB3                     | 0.92  | 0.91  | 0.87 | 0.89 | 0.84 | 0.84 |
| E5900 | cerbB4                     | 1.09  | 1.16  | 0.79 | 0.85 | 0.81 | 0.92 |
| J2128 | cJun pSer63                | 14.03 | 22.09 | 0.21 | 0.47 | 0.33 | 0.37 |
| J2253 | cJun pSer73                | 0.99  | 0.61  | 0.37 | 0.42 | 0.66 | 0.18 |
| M4439 | cMyc                       | 0.98  | 1.16  | 0.69 | 0.70 | 0.70 | 0.66 |
| C3956 | cMyc                       | 0.96  | 0.99  | 0.81 | 0.84 | 0.84 | 0.83 |
| U3254 | Uvomorulin ECadherin       | 0.93  | 0.95  | 0.82 | 0.79 | 0.89 | 0.81 |
| C2542 | NCadherin                  | 0.76  | 0.86  | 0.69 | 0.58 | 0.79 | 0.52 |
| C2667 | NCadherin                  | 1.29  | 1.16  | 0.99 | 0.92 | 1.05 | 0.96 |
| C1821 | Pan Cadherin               | 1.07  | 1.00  | 0.89 | 0.94 | 0.97 | 0.91 |
| C7354 | CalbindinD28K              | 0.95  | 0.99  | 0.92 | 0.96 | 1.38 | 0.97 |
| C1956 | Calcineurin aSubunit       | 0.95  | 1.01  | 0.96 | 0.94 | 0.96 | 0.98 |
| C6542 | Caldesmon                  | 1.08  | 1.08  | 0.99 | 0.97 | 1.11 | 1.19 |
| C7055 | Calmodulin                 | 1.12  | 1.15  | 1.10 | 1.08 | 1.27 | 1.23 |
| C4731 | Calnexin                   | 0.85  | 0.91  | 0.74 | 0.91 | 0.85 | 0.76 |
| C2687 | Calponin                   | 1.20  | 1.23  | 1.12 | 1.09 | 1.10 | 1.09 |
| C4606 | Calreticulin               | 1.25  | 1.21  | 1.30 | 1.27 | 1.35 | 1.21 |
| C7479 | Calretinin                 | 1.22  | 1.08  | 1.05 | 0.94 | 1.19 | 1.10 |
| C7867 | Claspin                    | 1.08  | 1.14  | 1.02 | 1.10 | 1.05 | 1.02 |
| C2851 | CaM Kinase IV CaMKIV       | 1.05  | 1.09  | 1.10 | 1.15 | 1.00 | 1.04 |
| C7099 | CaM Kinase Kinase a CaMKKa | 1.19  | 1.12  | 0.99 | 0.93 | 1.03 | 1.09 |
| C6974 | CaM Kinase IIa             | 1.06  | 1.03  | 1.02 | 1.26 | 1.22 | 1.13 |
| C9973 | CaM Kinase IV              | 1.00  | 1.00  | 1.02 | 1.08 | 0.99 | 0.99 |
| C4856 | CASK LIN2                  | 0.96  | 0.99  | 1.04 | 1.02 | 0.92 | 0.94 |
| C3617 | Casein Kinase 2b           | 1.13  | 0.98  | 0.84 | 1.53 | 1.08 | 1.02 |
| C7349 | Caspase 2                  | 1.04  | 1.01  | 1.13 | 1.22 | 1.39 | 1.12 |
| C9598 | Caspase 3                  | 0.92  | 0.92  | 0.99 | 0.95 | 0.91 | 0.86 |

|       |                          |      |      |       |      |       |      |
|-------|--------------------------|------|------|-------|------|-------|------|
| C8487 | Caspase 3 Active         | 1.04 | 1.04 | 1.10  | 1.09 | 1.06  | 0.94 |
| C4481 | Caspase 4                | 1.38 | 1.17 | 1.19  | 1.73 | 1.94  | 1.90 |
| C3392 | Caspase 4                | 1.20 | 1.14 | 1.36  | 1.57 | 1.99  | 1.85 |
| C6979 | Caspase 5                | 1.26 | 1.08 | 1.09  | 1.09 | 1.16  | 0.92 |
| C7599 | Caspase 6                | 0.97 | 1.05 | 1.07  | 1.01 | 0.98  | 0.90 |
| C7724 | Caspase 7                | 0.98 | 1.00 | 1.09  | 1.07 | 1.00  | 0.96 |
| C1104 | Caspase 7                | 1.09 | 1.03 | 1.06  | 1.37 | 1.34  | 1.39 |
| C3101 | Caspase 8                | 1.19 | 1.11 | 1.29  | 1.73 | 2.20  | 1.88 |
| C2976 | Caspase 8                | 1.17 | 1.09 | 1.46  | 1.49 | 1.49  | 1.50 |
| C4106 | Caspase 8                | 1.09 | 1.11 | 1.30  | 1.11 | 1.54  | 1.34 |
| C7849 | ProCaspase 8             | 1.03 | 1.02 | 1.25  | 1.54 | 1.62  | 1.43 |
| C7729 | Caspase 9                | 1.09 | 1.06 | 1.19  | 1.28 | 1.26  | 1.45 |
| C4356 | Caspase 9                | 1.26 | 1.17 | 2.04  | 2.32 | 2.67  | 2.44 |
| C8351 | Caspase10                | 1.03 | 1.05 | 1.26  | 1.15 | 1.24  | 1.16 |
| C1229 | Caspase 10               | 1.21 | 0.94 | 1.40  | 2.23 | 2.58  | 2.48 |
| C1354 | Caspase11                | 1.13 | 1.04 | 1.22  | 1.34 | 1.31  | 1.51 |
| C7611 | Caspase12                | 1.16 | 1.20 | 5.01  | 2.33 | 3.59  | 4.06 |
| C8854 | Caspase13                | 0.36 | 0.40 | 1.33  | 2.12 | 1.00  | 1.00 |
| C0979 | Catalase                 | 1.06 | 1.03 | 1.25  | 1.23 | 1.50  | 1.58 |
| C8114 | a E Catenin              | 0.90 | 0.89 | 1.40  | 1.50 | 1.25  | 1.56 |
| C8239 | aNCatenin                | 0.83 | 0.85 | 1.50  | 1.24 | 1.14  | 1.22 |
| C2081 | aCatenin                 | 0.88 | 0.89 | 1.24  | 1.04 | 1.04  | 1.01 |
| C7207 | bCatenin                 | 0.90 | 0.80 | 2.14  | 2.80 | 12.81 | 2.87 |
| C7082 | bCatenin                 | 0.96 | 0.99 | 1.65  | 1.57 | 1.56  | 1.78 |
| C8616 | bCatenin pThr41          | 1.29 | 1.28 | 18.22 | 2.14 | 2.68  | 1.85 |
| C4231 | bCatenin pSer33pSer37    | 1.07 | 1.09 | 4.80  | 1.43 | 1.69  | 1.66 |
| C5615 | phospho-b-Catenin pSer45 | 1.01 | 1.00 | 2.80  | 2.20 | 3.90  | 2.02 |
| C2363 | bCatenin pSer33          | 0.96 | 0.95 | 1.29  | 1.14 | 1.14  | 1.10 |
| C4864 | dCatenin NPRAP           | 0.87 | 0.88 | 1.35  | 1.13 | 1.10  | 1.07 |
| C0715 | Cathepsin D              | 0.94 | 0.91 | 1.00  | 0.91 | 1.29  | 1.16 |
| C2970 | Cathepsin L              | 1.00 | 1.04 | 1.01  | 0.95 | 1.06  | 1.17 |
| C3237 | Caveolin1                | 0.97 | 0.95 | 1.12  | 1.05 | 1.00  | 1.01 |
| C5987 | CD40                     | 0.57 | 0.71 | 0.81  | 0.57 | 0.48  | 0.68 |
| C2238 | Cdc14A                   | 1.14 | 1.12 | 1.19  | 1.04 | 1.33  | 1.19 |
| C0349 | Cdc25c                   | 1.35 | 1.37 | 1.57  | 1.40 | 1.39  | 1.35 |
| C9479 | Cdc25A                   | 0.93 | 0.94 | 0.98  | 0.70 | 0.88  | 0.91 |
| C7104 | Cdc27                    | 0.44 | 0.47 | 0.75  | 0.42 | 0.56  | 0.36 |
| C0224 | Cdc6                     | 0.91 | 0.99 | 1.23  | 1.06 | 1.18  | 1.12 |
| C6613 | Cdc7 Kinase              | 1.15 | 1.11 | 1.23  | 1.07 | 1.13  | 1.27 |
| C7855 | Cdh1                     | 1.14 | 1.17 | 1.36  | 1.17 | 1.16  | 1.16 |
| C4973 | Cdk1                     | 0.63 | 0.77 | 0.85  | 0.67 | 0.75  | 0.73 |
|       | Negative Control         | 0.68 | 0.60 | 0.67  | 0.76 | 0.48  | 0.75 |
| C8218 | Cdk4                     | 1.29 | 1.28 | 1.62  | 1.38 | 1.49  | 1.42 |
| C8343 | Cdk6                     | 1.03 | 1.05 | 1.12  | 0.97 | 1.05  | 1.13 |
| C7089 | Cdk7 cak                 | 0.98 | 1.03 | 1.10  | 1.04 | 1.07  | 1.14 |
| T1827 | TBP                      | 0.99 | 0.99 | 1.51  | 1.12 | 1.08  | 1.11 |
| C7488 | CENPE                    | 0.84 | 0.86 | 1.05  | 0.97 | 0.95  | 0.88 |
| C7736 | Centrin                  | 1.10 | 1.05 | 1.30  | 1.16 | 1.28  | 1.21 |
| C9358 | Chk1                     | 0.90 | 0.94 | 1.16  | 0.98 | 1.09  | 0.95 |
| C9108 | Chk2                     | 1.00 | 1.05 | 1.60  | 1.12 | 1.16  | 1.22 |
| C9233 | Chk2                     | 1.09 | 1.10 | 1.53  | 1.15 | 1.23  | 1.15 |
| C8035 | Chondroitin Sulfate      | 1.26 | 1.31 | 1.62  | 1.52 | 1.45  | 1.32 |
| C5867 | Ciliated Cell Marker     | 0.71 | 0.72 | 0.93  | 1.30 | 0.90  | 1.61 |
| C8116 | CIN85                    | 0.76 | 0.74 | 1.01  | 1.12 | 1.06  | 1.07 |
| C5367 | Casein Kinase 2a         | 0.85 | 0.82 | 0.98  | 0.97 | 0.99  | 1.02 |
| C1985 | Clathrin Light Chain     | 0.89 | 0.90 | 0.92  | 1.09 | 1.10  | 1.09 |
| C1860 | Clathrin Heavy Chain     | 0.67 | 0.74 | 1.01  | 0.96 | 1.12  | 1.08 |

|       |                                |      |      |      |      |      |      |
|-------|--------------------------------|------|------|------|------|------|------|
| C5922 | CNPase                         | 0.65 | 0.69 | 0.91 | 0.91 | 1.00 | 1.14 |
| C8736 | Cofilin                        | 0.78 | 0.76 | 0.87 | 0.88 | 0.92 | 0.81 |
| C1862 | Collin                         | 0.76 | 0.75 | 0.99 | 0.82 | 1.09 | 0.92 |
| C1926 | Collagen Type IV               | 0.98 | 0.96 | 1.10 | 1.24 | 1.07 | 1.34 |
| C3470 | Connexin 32                    | 0.97 | 0.95 | 0.95 | 0.95 | 0.98 | 1.06 |
| C6344 | Connexin 32                    | 1.14 | 1.11 | 1.08 | 1.18 | 1.22 | 1.33 |
| C8093 | Connexin43                     | 0.92 | 0.88 | 0.96 | 0.94 | 0.97 | 0.97 |
| C6219 | Connexin 43                    | 0.91 | 0.87 | 0.93 | 0.88 | 0.94 | 0.93 |
| G6160 | bCOP                           | 0.86 | 0.83 | 1.00 | 0.97 | 1.11 | 1.06 |
| C6987 | Cortactin                      | 0.88 | 0.83 | 0.99 | 1.00 | 1.13 | 1.06 |
| C5348 | Corticotropin Releasing Factor | 1.03 | 0.98 | 1.19 | 1.11 | 1.20 | 1.22 |
| C9354 | COX II                         | 0.75 | 0.69 | 0.78 | 0.67 | 0.95 | 0.67 |
| C0978 | CrkL                           | 0.90 | 0.94 | 1.06 | 1.02 | 1.14 | 1.01 |
| C0853 | Crk II                         | 0.95 | 0.92 | 1.03 | 1.03 | 1.14 | 1.04 |
| C7863 | Csk                            | 0.75 | 0.75 | 0.77 | 0.84 | 0.84 | 0.79 |
| C9491 | CtBP1                          | 0.95 | 0.93 | 0.96 | 1.00 | 1.03 | 0.97 |
| C8741 | CtBP1                          | 1.15 | 1.02 | 1.12 | 1.00 | 1.47 | 1.00 |
| C5112 | CUGBP1                         | 0.97 | 0.78 | 0.75 | 2.15 | 0.79 | 2.15 |
| C4710 | Cyclin A                       | 1.53 | 1.30 | 1.09 | 1.62 | 1.17 | 2.20 |
| C8831 | Cyclin B1                      | 1.16 | 1.21 | 0.94 | 1.34 | 1.04 | 1.39 |
| C5588 | Cyclin D1                      | 1.05 | 1.03 | 1.09 | 1.20 | 0.97 | 1.10 |
| C7464 | Cyclin D1                      | 0.95 | 0.59 | 0.71 | 0.66 | 0.59 | 0.73 |
| C7339 | Cyclin D2                      | 1.24 | 1.20 | 1.23 | 1.20 | 1.26 | 1.29 |
| C7214 | Cyclin D3                      | 1.24 | 1.20 | 1.18 | 1.31 | 1.15 | 1.40 |
| C5351 | Cyclin H                       | 1.30 | 1.22 | 1.32 | 1.09 | 1.20 | 1.54 |
| C3095 | Cystatin A                     | 1.13 | 1.08 | 1.09 | 1.08 | 1.09 | 1.26 |
| C8979 | Cytohesin1                     | 0.91 | 0.85 | 0.85 | 1.04 | 1.05 | 1.06 |
| C5176 | Cytokeratin peptide4           | 1.20 | 1.16 | 1.17 | 1.13 | 1.13 | 1.39 |
| C7785 | Cytokeratin CK5                | 1.57 | 0.76 | 1.02 | 0.64 | 0.51 | 1.18 |
| C6417 | Cytokeratin peptide 7          | 1.35 | 1.48 | 1.51 | 1.34 | 1.65 | 1.62 |
| C7034 | Cytokeratin 8 12               | 1.02 | 1.00 | 1.21 | 1.00 | 1.49 | 1.38 |
| C6909 | Cytokeratin 8 13               | 0.77 | 0.80 | 0.90 | 0.93 | 0.91 | 0.98 |
| C0791 | Cytokeratin peptide 13         | 0.92 | 0.91 | 1.01 | 0.87 | 0.84 | 0.98 |
| C9179 | Cytokeratin Peptide 17         | 1.13 | 1.10 | 1.15 | 1.04 | 1.20 | 1.21 |
| C1399 | Cytokeratin peptide 18         | 1.09 | 1.03 | 1.05 | 1.05 | 1.13 | 1.14 |
| C6930 | Cytokeratin peptide 19         | 1.23 | 0.98 | 1.33 | 1.42 | 1.41 | 1.92 |
| C2931 | Pan Cytokeratin                | 0.93 | 0.97 | 1.10 | 1.02 | 1.00 | 0.99 |
| D2178 | DAPK                           | 1.27 | 1.09 | 1.07 | 1.02 | 1.29 | 1.00 |
| D4941 | DAPK pSer308                   | 1.05 | 1.02 | 1.01 | 1.03 | 1.18 | 0.92 |
| D3191 | DAP Kinase 2                   | 1.02 | 0.78 | 0.88 | 1.16 | 0.84 | 0.87 |
| D7810 | Daxx                           | 1.04 | 0.97 | 1.34 | 1.38 | 1.18 | 1.32 |
| D3566 | DcR1                           | 1.05 | 0.31 | 4.09 | 1.87 | 0.63 | 4.75 |
| D3188 | DcR2                           | 0.29 | 0.33 | 0.53 | 0.51 | 0.33 | 0.30 |
| D1814 | DcR3                           | 0.74 | 0.26 | 1.00 | 1.95 | 0.90 | 1.00 |
| D3316 | DEDAF                          | 0.20 | 0.34 | 0.54 | 0.24 | 0.31 | 0.33 |
| D1033 | Desmin                         | 1.23 | 1.14 | 1.42 | 1.32 | 1.20 | 1.27 |
| D1286 | Desmosomal Protein             | 1.29 | 1.23 | 1.70 | 1.36 | 1.44 | 1.48 |
| D8940 | Dextrin ADF                    | 1.10 | 1.12 | 1.21 | 1.00 | 1.13 | 1.22 |
| D0188 | DNASE I                        | 1.63 | 0.81 | 2.31 | 1.76 | 0.86 | 2.49 |
| D1689 | DNASE II                       | 0.30 | 0.17 | 0.99 | 0.30 | 0.02 | 0.66 |
| D4567 | DNMT1                          | 1.06 | 1.02 | 1.29 | 1.22 | 1.11 | 1.18 |
| D4692 | DNMT1                          | 1.01 | 1.03 | 1.19 | 1.13 | 1.06 | 1.11 |
| D0180 | DOPA Decarboxylase             | 1.06 | 0.94 | 1.21 | 1.05 | 1.07 | 1.27 |
| D7438 | DP2                            | 0.99 | 0.94 | 1.15 | 1.02 | 0.92 | 1.02 |
| D3563 | DR3                            | 0.42 | 0.24 | 1.16 | 1.49 | 0.17 | 1.57 |
| D3813 | DR4                            | 0.75 | 0.75 | 0.70 | 0.77 | 0.72 | 0.77 |
| D3938 | DR5                            | 0.23 | 0.27 | 0.39 | 0.41 | 0.26 | 0.23 |

|       |                                     |      |      |      |      |      |      |
|-------|-------------------------------------|------|------|------|------|------|------|
| D1564 | DR6                                 | 1.43 | 0.38 | 1.00 | 0.93 | 0.15 | 0.97 |
| D1314 | DRAK1                               | 0.12 | 0.28 | 0.29 | 0.40 | 0.29 | 0.19 |
| D8168 | Dystrophin                          | 1.20 | 1.14 | 1.58 | 1.13 | 1.25 | 1.34 |
| D8043 | Dystrophin                          | 1.15 | 1.01 | 1.24 | 1.15 | 1.17 | 1.03 |
| E9026 | E2F1                                | 0.84 | 0.79 | 0.98 | 0.94 | 0.84 | 0.71 |
| E8901 | E2F1                                | 1.03 | 1.04 | 1.04 | 1.25 | 0.91 | 1.38 |
| E8776 | E2F2                                | 1.03 | 1.02 | 1.03 | 1.12 | 0.98 | 1.19 |
| E8651 | E2F3                                | 1.11 | 1.13 | 0.86 | 1.01 | 0.91 | 1.26 |
| E8526 | E2F4                                | 1.13 | 1.14 | 0.80 | 0.99 | 0.84 | 1.27 |
| E8655 | E6AP                                | 1.22 | 1.27 | 1.34 | 1.27 | 1.19 | 1.84 |
| E3138 | EGF receptor                        | 0.98 | 1.10 | 1.05 | 0.98 | 0.89 | 1.19 |
| E1523 | ERK5 BIG MAPKBMK1                   | 0.91 | 0.94 | 0.92 | 1.01 | 0.95 | 0.96 |
| E4013 | Elastin                             | 1.24 | 1.23 | 1.12 | 1.13 | 1.16 | 1.26 |
| E4531 | ELKS                                | 1.44 | 1.36 | 1.30 | 1.36 | 1.28 | 1.80 |
| E6280 | Endothelial Cell Protein C Receptor | 1.37 | 1.44 | 1.71 | 1.37 | 1.36 | 1.56 |
| E9653 | Endothelial Cells                   | 1.05 | 1.06 | 0.88 | 0.81 | 0.88 | 1.06 |
| E0771 | Endothelin                          | 1.19 | 1.19 | 1.23 | 1.14 | 1.18 | 1.20 |
| E2520 | Epidermal Growth Factor             | 0.93 | 0.97 | 0.81 | 0.92 | 0.75 | 0.91 |
| E0143 | Episialin                           | 1.15 | 1.20 | 1.31 | 1.12 | 1.08 | 1.47 |
| E5031 | ERP57                               | 1.27 | 1.24 | 1.45 | 1.16 | 1.10 | 1.36 |
| E0521 | Estrogen Receptor                   | 0.95 | 0.95 | 0.96 | 1.04 | 0.94 | 0.99 |
| E1396 | Estrogen receptor                   | 0.95 | 0.96 | 1.06 | 1.05 | 1.02 | 0.97 |
| E1531 | Exportin T                          | 1.13 | 1.29 | 1.98 | 1.33 | 1.33 | 2.05 |
| E8897 | Ezrin                               | 1.32 | 1.28 | 1.30 | 1.22 | 1.21 | 1.34 |
| F3428 | F1A                                 | 0.54 | 0.54 | 0.41 | 0.42 | 0.35 | 0.39 |
| F8053 | FADD                                | 1.39 | 1.41 | 2.01 | 1.38 | 1.68 | 1.60 |
| F2918 | Focal Adhesion Kinase pp125FAK      | 0.98 | 0.98 | 1.06 | 1.03 | 1.00 | 0.92 |
| F9051 | FAK Phospho pSer772                 | 5.11 | 5.37 | 2.60 | 1.00 | 0.62 | 1.02 |
| F9301 | FAK Phospho pSer910                 | 1.83 | 1.86 | 2.43 | 2.32 | 2.29 | 1.87 |
| F7926 | FAK pTyr397                         | 1.15 | 1.07 | 1.53 | 1.13 | 1.45 | 0.98 |
| F8926 | FAK pTyr577                         | 1.03 | 0.70 | 0.71 | 0.81 | 0.89 | 0.58 |
| F5303 | Falkor PHD1                         | 1.12 | 0.99 | 1.12 | 0.97 | 1.18 | 1.21 |
| F4424 | Fas CD95 Apo1                       | 1.14 | 1.06 | 1.03 | 0.98 | 1.05 | 1.07 |
| F2051 | Fas Ligand                          | 1.01 | 0.97 | 0.96 | 0.99 | 1.02 | 1.07 |
| F1926 | Fas Ligand                          | 1.02 | 1.00 | 1.00 | 1.01 | 1.06 | 1.10 |
| F9429 | FBI1 PAKEMON                        | 1.22 | 1.14 | 1.29 | 1.14 | 2.17 | 1.84 |
| F1672 | Fibroblast Growth Factor9           | 0.75 | 0.78 | 0.82 | 0.89 | 0.70 | 0.73 |
| F0791 | Fibronectin                         | 1.30 | 1.29 | 1.21 | 1.18 | 1.29 | 1.34 |
| F3648 | Fibronectin                         | 1.05 | 0.98 | 1.01 | 0.96 | 1.05 | 1.09 |
| F7387 | Fibronectin                         | 1.27 | 1.14 | 1.17 | 1.14 | 1.26 | 1.40 |
| F1888 | Filamin                             | 1.31 | 1.27 | 1.24 | 1.17 | 1.31 | 1.37 |
| F1043 | Filensin                            | 1.14 | 1.12 | 1.06 | 1.16 | 1.16 | 1.21 |
| F6928 | FKHR FOXO1a                         | 1.12 | 1.08 | 1.10 | 1.05 | 1.34 | 1.20 |
| F2178 | FKHRL1 FOXO3a                       | 1.01 | 0.91 | 1.02 | 1.00 | 1.08 | 1.07 |
| F1304 | FKHRL1                              | 1.11 | 1.17 | 1.16 | 1.07 | 1.19 | 1.24 |
| F9925 | FLIPg d                             | 0.73 | 0.58 | 0.58 | 0.57 | 0.57 | 0.52 |
| F1054 | FOXC2                               | 1.21 | 1.23 | 1.40 | 1.64 | 1.87 | 1.78 |
| F6304 | FOXP2                               | 1.04 | 1.01 | 1.17 | 1.13 | 1.24 | 1.20 |
| F0305 | FANCD2                              | 1.09 | 1.05 | 1.03 | 1.06 | 1.03 | 1.04 |
| F1554 | FXR2                                | 1.40 | 1.38 | 1.49 | 1.32 | 1.37 | 1.34 |
| F9052 | FRS2                                | 0.95 | 0.91 | 0.95 | 0.95 | 0.94 | 0.91 |
| G6919 | G9a Methyltransferase               | 1.23 | 1.18 | 1.54 | 1.73 | 1.61 | 2.44 |
| G4913 | Glutamic Acid Decarboxylase 65      | 0.85 | 0.84 | 0.95 | 0.98 | 0.97 | 0.85 |
| G5038 | GAD 65                              | 1.19 | 1.19 | 1.37 | 1.37 | 1.37 | 1.37 |
| G5163 | Glutamic Acid Decarboxylase GAD65 6 | 0.80 | 0.80 | 0.96 | 0.92 | 0.92 | 0.78 |
| G6916 | GADD153                             | 0.91 | 0.94 | 1.09 | 0.96 | 1.04 | 0.89 |
| G6666 | GAP11P4BP                           | 1.15 | 1.11 | 1.27 | 1.14 | 1.31 | 1.22 |

|       |                                      |      |      |       |      |      |       |
|-------|--------------------------------------|------|------|-------|------|------|-------|
| G8795 | GAPDH                                | 0.99 | 0.95 | 1.20  | 0.96 | 1.04 | 1.11  |
| G0290 | GATA1                                | 0.84 | 0.86 | 0.98  | 0.99 | 0.93 | 0.93  |
| G4896 | Gelsolin                             | 1.13 | 1.13 | 1.25  | 1.04 | 1.19 | 1.25  |
| G6669 | Gemin 2                              | 1.26 | 1.24 | 1.38  | 1.19 | 1.30 | 1.27  |
| G6544 | Gemin3                               | 1.27 | 1.21 | 1.28  | 1.22 | 1.41 | 1.37  |
| G9269 | GFAP Glial Fibrillary Acidic Protein | 0.88 | 0.91 | 1.09  | 1.08 | 1.01 | 1.02  |
| G3893 | GFAP                                 | 1.37 | 1.26 | 1.81  | 1.11 | 1.65 | 1.27  |
| G6670 | Growth Factor Independence1          | 1.14 | 1.10 | 1.16  | 0.95 | 1.17 | 1.20  |
| G9038 | Glutamate receptor NMDAR 2a          | 0.75 | 0.79 | 0.96  | 0.89 | 0.93 | 0.74  |
| G2781 | Glutamine Synthetase                 | 1.14 | 1.09 | 1.29  | 1.24 | 1.21 | 1.16  |
| G7914 | Glycogen Synthase Kinase3b           | 1.11 | 1.10 | 1.25  | 0.93 | 1.21 | 1.05  |
| G4414 | Glycogen Synthase Kinase3            | 1.30 | 1.32 | 1.47  | 1.27 | 1.54 | 1.35  |
| G6414 | Glycogen Synthase Kinase3 GSK3       | 1.11 | 1.12 | 1.48  | 1.18 | 1.58 | 1.08  |
| G1044 | GRANZYME B                           | 0.98 | 0.97 | 1.14  | 1.03 | 1.04 | 0.94  |
| G2791 | Grb2                                 | 0.98 | 0.97 | 1.21  | 0.90 | 1.06 | 0.89  |
| G7670 | GRK2                                 | 1.06 | 1.05 | 1.07  | 0.98 | 1.07 | 1.00  |
| G6541 | GRP1                                 | 1.16 | 1.18 | 1.34  | 1.28 | 1.34 | 1.27  |
| G4170 | GRP75                                | 0.87 | 0.12 | 2.61  | 2.25 | 0.52 | 2.13  |
| G8918 | GRP78 BiP                            | 0.87 | 0.82 | 1.08  | 1.09 | 0.93 | 1.00  |
| G4420 | GRP94                                | 1.00 | 0.67 | 4.24  | 2.85 | 1.08 | 2.12  |
| A8103 | hABH1                                | 1.44 | 1.46 | 1.39  | 1.25 | 1.24 | 1.60  |
| A8228 | hABH2                                | 1.01 | 0.86 | 1.25  | 1.04 | 1.11 | 1.51  |
| A8353 | hABH3                                | 1.17 | 0.90 | 1.28  | 1.08 | 1.15 | 1.42  |
| H9787 | hBRM hSNF2a                          | 1.54 | 1.24 | 3.33  | 2.50 | 1.68 | 9.55  |
| H7161 | HAT1                                 | 0.97 | 1.16 | 1.17  | 1.03 | 1.00 | 1.02  |
| H3284 | HDAC1                                | 0.91 | 0.86 | 1.24  | 1.18 | 1.12 | 1.10  |
| H6287 | HDAC1                                | 1.19 | 0.94 | 1.24  | 1.07 | 1.05 | 1.12  |
| H3159 | HDAC2                                | 0.94 | 0.93 | 1.16  | 1.12 | 1.01 | 1.04  |
| H2663 | HDAC2                                | 1.29 | 1.48 | 1.77  | 1.24 | 1.45 | 1.40  |
| H6537 | HDAC3                                | 1.01 | 1.02 | 1.11  | 1.02 | 1.04 | 1.05  |
| H3034 | HDAC3                                | 0.91 | 0.91 | 1.14  | 1.09 | 1.02 | 1.02  |
| H9411 | HDAC4                                | 0.99 | 1.03 | 1.25  | 1.02 | 1.05 | 1.06  |
| H9536 | HDAC4                                | 1.06 | 1.07 | 1.21  | 1.03 | 1.07 | 1.10  |
| H4538 | HDAC5                                | 1.20 | 0.88 | 1.98  | 1.34 | 1.33 | 1.38  |
| H8163 | HDAC5                                | 1.00 | 1.04 | 18.42 | 6.35 | 5.90 | 10.03 |
| H2287 | HDAC6                                | 0.76 | 0.90 | 1.69  | 1.10 | 0.93 | 0.81  |
| H2537 | HDAC7                                | 0.69 | 0.71 | 0.91  | 1.14 | 0.84 | 0.77  |
| H6663 | HDAC7                                | 1.41 | 0.97 | 1.47  | 1.30 | 1.23 | 1.59  |
| H6412 | HDAC8                                | 1.51 | 1.26 | 2.08  | 1.64 | 1.45 | 2.08  |
| H3413 | HDAC10                               | 0.84 | 0.90 | 1.31  | 1.35 | 0.87 | 1.11  |
| H2913 | HDAC11                               | 1.14 | 1.13 | 1.14  | 1.29 | 1.13 | 1.78  |
| H9163 | HDRP MITR                            | 1.11 | 1.11 | 1.17  | 0.98 | 1.16 | 1.19  |
| H4163 | Heat Shock Factor 1                  | 4.40 | 2.67 | 1.49  | 0.88 | 1.35 | 2.99  |
| H6788 | Heat Shock Factor 2                  | 1.00 | 1.03 | 1.21  | 1.16 | 0.89 | 0.78  |
| H0148 | Heat Shock Protein 25                | 1.35 | 1.46 | 1.52  | 1.01 | 1.53 | 1.63  |
| P1498 | Heat Shock Protein 27                | 0.99 | 1.01 | 0.99  | 0.91 | 0.91 | 0.95  |
| H2289 | HSP 27 25                            | 1.55 | 1.48 | 1.40  | 1.19 | 1.37 | 1.40  |
| H5147 | HSP70                                | 4.26 | 5.06 | 16.42 | 2.95 | 4.08 | 16.83 |
| H1775 | HSP 90                               | 1.53 | 1.74 | 1.66  | 1.18 | 1.43 | 1.67  |
| H7412 | Heat Shock Protein 110               | 0.96 | 0.95 | 0.99  | 1.15 | 1.01 | 1.07  |
| H7287 | Heat Shock Protein 110               | 1.46 | 1.47 | 0.87  | 1.01 | 1.16 | 1.13  |
| H9286 | Acetyl Histone H3 AcLys9             | 1.32 | 1.44 | 8.11  | 1.47 | 0.79 | 1.38  |
| H0913 | Acetyl Histone H3 AcLys9             | 1.23 | 1.24 | 1.33  | 0.93 | 1.26 | 1.35  |
| H9161 | Acetyl phospho Histone H3 AL9 S10    | 1.05 | 1.13 | 1.22  | 1.16 | 0.98 | 1.13  |
| H0788 | Acetyl phospho Histone H3 AL9 S10    | 1.22 | 1.20 | 1.44  | 1.40 | 3.97 | 1.82  |
| D5692 | Dimethyl Histone H3 diMeLys4         | 0.92 | 0.95 | 1.07  | 1.06 | 0.95 | 0.94  |
| D5567 | Dimethyl Histone H3 diMeLys9         | 0.70 | 0.77 | 0.77  | 0.87 | 0.80 | 0.74  |

|       |                                    |      |      |       |      |      |       |
|-------|------------------------------------|------|------|-------|------|------|-------|
| H7162 | methyl Histone H3 MeLys9           | 0.96 | 0.97 | 1.19  | 1.00 | 1.11 | 0.92  |
| H5912 | phosphoHistone H2AX pSer139        | 0.93 | 1.02 | 1.23  | 1.32 | 1.17 | 0.95  |
| H6409 | Histone H3 pSer10                  | 1.30 | 1.52 | 10.66 | 2.48 | 3.69 | 15.50 |
| H9908 | Histone H3 pSer28                  | 0.93 | 0.97 | 1.11  | 1.16 | 1.00 | 1.45  |
| H0412 | Histone H3 pSer10                  | 1.10 | 1.10 | 1.26  | 1.24 | 1.20 | 1.29  |
| S8316 | SUV39H1 Histone Methyl Transferase | 1.10 | 1.05 | 1.07  | 1.05 | 1.17 | 1.28  |
| H9537 | HMG1                               | 1.13 | 1.05 | 1.04  | 0.98 | 1.17 | 1.21  |
| M5818 | hMps1                              | 1.19 | 1.10 | 1.08  | 1.05 | 1.19 | 1.39  |
| R4528 | hnRNPA1                            | 1.21 | 1.12 | 1.08  | 1.10 | 1.24 | 1.27  |
| R9778 | hnRNPA1                            | 1.28 | 1.18 | 1.22  | 1.13 | 1.17 | 1.47  |
| R4653 | hnRNPA2B1                          | 1.27 | 1.11 | 1.25  | 1.18 | 1.43 | 1.44  |
| R5028 | hnRNPC1C2                          | 1.46 | 1.32 | 1.42  | 1.41 | 1.88 | 2.03  |
| R8903 | hnRNP KJ                           | 1.19 | 1.18 | 1.10  | 1.08 | 1.31 | 1.35  |
| R4903 | hnRNPL                             | 1.28 | 1.21 | 1.16  | 1.07 | 1.27 | 1.33  |
| R5653 | hnRNPQ                             | 1.35 | 1.24 | 1.27  | 1.19 | 1.66 | 1.65  |
| R6278 | hnRNPU                             | 1.34 | 1.27 | 1.24  | 1.16 | 1.48 | 1.38  |
| R3777 | hnRNP M3 M4                        | 1.18 | 1.09 | 1.06  | 1.00 | 1.18 | 1.18  |
| P5998 | hPlk1                              | 1.24 | 1.10 | 1.07  | 1.20 | 1.50 | 1.26  |
| P6123 | hPlk1                              | 1.29 | 1.14 | 1.31  | 1.14 | 1.83 | 1.45  |
| H9912 | hSNF5 IN11                         | 1.00 | 0.95 | 1.01  | 1.03 | 1.08 | 1.05  |
| A4605 | iASPP                              | 1.31 | 1.29 | 1.26  | 1.27 | 1.94 | 1.44  |
| I1659 | IFI16                              | 1.40 | 1.22 | 1.45  | 1.54 | 2.00 | 2.73  |
| I0505 | IkB a                              | 1.06 | 0.99 | 1.13  | 1.16 | 1.30 | 1.10  |
| I6139 | IKKa                               | 1.15 | 1.08 | 1.20  | 1.21 | 1.38 | 1.30  |
| I0783 | ILK                                | 1.31 | 1.11 | 1.23  | 1.23 | 2.02 | 1.23  |
| I1907 | ILK                                | 0.96 | 0.92 | 0.97  | 1.07 | 1.08 | 0.99  |
| I4782 | ILP2                               | 0.44 | 0.41 | 0.44  | 0.61 | 0.57 | 0.35  |
| I9658 | Importina1                         | 1.46 | 1.37 | 2.25  | 1.48 | 1.95 | 2.01  |
| I9783 | Importin a3                        | 1.83 | 1.49 | 2.43  | 1.26 | 2.17 | 1.50  |
| I9908 | Importina 5 7                      | 1.59 | 1.53 | 1.83  | 1.43 | 2.16 | 1.59  |
| I5283 | INCENP                             | 1.01 | 1.01 | 1.33  | 1.11 | 1.08 | 0.98  |
| I3659 | ING1                               | 1.45 | 1.45 | 1.54  | 1.13 | 1.71 | 1.50  |
| I0282 | alIntermexin                       | 1.32 | 1.34 | 1.39  | 1.04 | 1.54 | 1.31  |
| J3395 | JAB 1                              | 1.13 | 1.12 | 1.27  | 1.13 | 1.28 | 1.08  |
| J3020 | JAB1                               | 1.04 | 1.00 | 1.09  | 1.01 | 1.05 | 1.01  |
| J3774 | JAK1                               | 1.41 | 1.39 | 1.64  | 1.04 | 1.88 | 1.29  |
| J4500 | cJun N Terminal Kinase             | 1.42 | 1.42 | 1.49  | 1.07 | 1.52 | 1.32  |
| J4750 | JNK Activated Diphosphorylated JNK | 1.53 | 1.57 | 1.92  | 1.27 | 2.11 | 1.36  |
| K0514 | KCNK9                              | 1.11 | 1.08 | 1.09  | 1.04 | 1.12 | 1.07  |
| K4263 | Kaiso                              | 1.96 | 1.73 | 3.39  | 1.25 | 3.02 | 1.53  |
| K3638 | KIF17                              | 0.95 | 0.96 | 1.02  | 0.92 | 1.10 | 0.89  |
| K3513 | KIF3A                              | 1.16 | 1.25 | 1.53  | 1.16 | 1.83 | 1.10  |
| K4261 | KSR                                | 1.22 | 1.28 | 1.51  | 1.24 | 1.72 | 1.14  |
| K2882 | Ku Antigen                         | 1.35 | 1.38 | 1.47  | 1.15 | 2.07 | 1.30  |
| L4543 | L1CAM                              | 1.34 | 1.30 | 1.79  | 1.18 | 2.54 | 1.56  |
| A0224 | Afadin                             | 1.02 | 1.04 | 1.14  | 0.94 | 1.23 | 0.93  |
| L9393 | Laminin                            | 0.93 | 0.95 | 0.99  | 0.90 | 1.02 | 0.81  |
| L0663 | Laminin2 a2 Chain                  | 2.35 | 2.35 | 3.07  | 2.25 | 7.63 | 2.93  |
| L3414 | LAP2 TMPO                          | 1.49 | 1.53 | 2.21  | 1.36 | 3.37 | 1.50  |
| L3410 | Leptin                             | 0.97 | 1.02 | 1.08  | 0.92 | 1.23 | 0.81  |
| L2290 | LIM Kinase1                        | 0.95 | 0.98 | 1.10  | 1.67 | 1.17 | 1.66  |
| L1538 | LIN7                               | 1.03 | 1.00 | 1.12  | 1.13 | 1.02 | 1.35  |
| L7391 | LIS1                               | 1.45 | 1.57 | 1.54  | 1.35 | 1.78 | 2.14  |
| L7917 | LKB1                               | 1.06 | 1.07 | 1.33  | 1.27 | 1.25 | 1.25  |
| L4793 | LDS1                               | 1.10 | 1.09 | 1.24  | 1.27 | 1.24 | 1.23  |
| M8069 | Mad1                               | 1.14 | 1.16 | 1.40  | 1.42 | 1.56 | 1.39  |
| M8694 | Mad2                               | 1.33 | 1.37 | 1.41  | 1.33 | 1.91 | 1.93  |

|       |                                              |       |       |      |      |       |       |
|-------|----------------------------------------------|-------|-------|------|------|-------|-------|
| M5683 | MADD                                         | 1.00  | 1.00  | 1.00 | 1.00 | 1.00  | 1.00  |
| M8194 | MAFF                                         | 1.18  | 1.16  | 1.32 | 1.32 | 1.44  | 1.30  |
| M5691 | MAG11                                        | 1.17  | 1.13  | 1.28 | 1.32 | 1.28  | 1.34  |
| M2441 | MAG12                                        | 1.18  | 1.14  | 1.29 | 1.37 | 1.39  | 1.35  |
| M7802 | MAP Kinase Activated Monophosphorylated Tyro | 1.32  | 1.41  | 2.06 | 2.21 | 1.22  | 2.28  |
| M3682 | MAP Kinase Monophosphorylated Tyro           | 1.62  | 1.49  | 1.24 | 1.83 | 1.36  | 1.46  |
| M9692 | MAP Kinase Activated Diphosphorylated Tyro   | 1.24  | 1.14  | 1.18 | 1.23 | 1.81  | 1.23  |
| M3557 | MAP Kinase Monophosphorylated Thre           | 1.59  | 1.52  | 1.32 | 1.64 | 3.40  | 1.87  |
| M7927 | MAP Kinase ERK1                              | 0.83  | 0.82  | 0.97 | 0.96 | 0.98  | 0.80  |
| M5670 | MAP Kinase Erk1Erk2                          | 1.03  | 1.08  | 1.07 | 0.98 | 1.06  | 1.06  |
| M3550 | MAP Kinase Activated Protein Kinase2         | 0.84  | 0.86  | 0.81 | 0.94 | 0.99  | 0.83  |
| M3787 | MAP Kinase Phosphatase1 MKP1                 | 1.00  | 1.00  | 1.08 | 1.13 | 1.27  | 1.01  |
| M3807 | MAPK non phosphorylated ERK                  | 1.34  | 1.37  | 1.65 | 1.63 | 2.91  | 1.76  |
| M7431 | MAP Kinase 2 ERK2                            | 1.00  | 1.00  | 1.00 | 0.90 | 0.34  | 1.00  |
| M5795 | MAP Kinase Kinase MEK MAPKK                  | 0.94  | 0.96  | 0.92 | 0.87 | 1.00  | 0.82  |
| M2320 | MAP2 2a 2b                                   | 1.30  | 1.15  | 1.69 | 1.43 | 2.51  | 1.41  |
| M4278 | MAP1                                         | 1.16  | 1.23  | 1.17 | 1.52 | 1.04  | 2.58  |
| M6783 | MAP1 Light Chain                             | 1.42  | 1.79  | 1.57 | 1.28 | 1.89  | 4.08  |
| M4528 | MAP1b                                        | 2.09  | 1.98  | 1.64 | 2.45 | 1.39  | 2.22  |
| M9942 | MAP2                                         | 1.36  | 1.55  | 1.51 | 1.89 | 4.16  | 1.61  |
| M6569 | MBD1                                         | 5.38  | 5.33  | 2.42 | 8.02 | 1.00  | 22.99 |
| M7568 | MBD2a                                        | 1.12  | 1.09  | 1.21 | 1.26 | 1.24  | 1.22  |
| M7318 | MBD2ab                                       | 14.85 | 18.03 | 1.00 | 6.46 | 0.32  | 1.00  |
| M9817 | MBD4                                         | 1.03  | 1.02  | 1.06 | 1.00 | 1.03  | 1.06  |
| M1944 | MBDin XAB1                                   | 1.22  | 1.25  | 1.42 | 1.31 | 1.61  | 1.27  |
| M3320 | MBNL1                                        | 3.07  | 3.21  | 3.49 | 1.88 | 13.64 | 32.63 |
| M8440 | MCH                                          | 0.95  | 0.96  | 0.88 | 1.05 | 1.12  | 0.92  |
| M8434 | Mcl1                                         | 1.00  | 0.97  | 1.02 | 1.11 | 1.15  | 1.02  |
| M2444 | MDC1                                         | 1.61  | 1.67  | 2.21 | 1.55 | 6.74  | 1.94  |
| M8558 | MDM2                                         | 1.19  | 1.25  | 1.38 | 1.13 | 1.98  | 1.49  |
| M4308 | MDM2                                         | 1.41  | 1.55  | 1.53 | 1.43 | 2.22  | 1.67  |
| M7815 | MDM2                                         | 1.23  | 1.22  | 1.04 | 1.09 | 1.30  | 1.26  |
| M0445 | MDMX                                         | 1.58  | 1.45  | 1.50 | 1.34 | 1.84  | 1.49  |
| M9317 | MeCP2                                        | 0.92  | 0.94  | 1.01 | 0.93 | 1.14  | 0.84  |
| M7443 | MeCP2                                        | 2.10  | 1.78  | 1.54 | 1.71 | 5.71  | 2.74  |
| M6818 | MeCP2                                        | 1.54  | 1.69  | 1.51 | 1.27 | 3.46  | 1.58  |
| M7194 | MEKK4                                        | 1.45  | 1.50  | 1.77 | 1.42 | 3.14  | 2.55  |
| M4937 | Melanocortin3 Receptor                       | 0.88  | 0.92  | 0.93 | 0.97 | 0.98  | 0.82  |
| M3068 | MGMT                                         | 1.54  | 1.43  | 1.68 | 1.67 | 2.38  | 1.85  |
| M3319 | Mint2                                        | 0.95  | 1.00  | 0.98 | 1.23 | 1.18  | 1.33  |
| L3044 | LRRK2 (PARK8)                                | 1.27  | 1.31  | 1.16 | 1.23 | 1.84  | 1.71  |
| M9192 | MRP1                                         | 1.60  | 1.45  | 1.25 | 1.41 | 2.40  | 1.46  |
| M3692 | MRP2                                         | 1.80  | 1.63  | 1.15 | 1.35 | 3.13  | 1.97  |
| M0939 | aMSH                                         | 1.10  | 1.08  | 1.18 | 1.16 | 1.22  | 1.13  |
| M2445 | MSH6                                         | 1.18  | 1.15  | 1.23 | 1.17 | 1.46  | 1.17  |
| M2820 | MSH6                                         | 2.26  | 1.95  | 1.34 | 2.07 | 2.87  | 3.38  |
| M5437 | MSK1                                         | 0.89  | 0.82  | 0.86 | 0.90 | 1.07  | 0.80  |
| M7569 | MTA 2                                        | 1.27  | 1.26  | 1.14 | 1.17 | 1.50  | 1.53  |
| M1320 | MTA1                                         | 1.30  | 1.38  | 1.11 | 1.14 | 1.73  | 1.40  |
| M7693 | MTA1                                         | 3.73  | 2.44  | 1.67 | 1.93 | 14.22 | 4.65  |
| M7818 | MTA2 MTA1L                                   | 1.04  | 1.00  | 1.01 | 0.98 | 1.15  | 1.00  |
| M0819 | MTA3L                                        | 1.06  | 1.02  | 1.10 | 1.14 | 1.34  | 1.08  |
| M3566 | MTBP                                         | 0.22  | 0.28  | 0.30 | 0.40 | 0.27  | 0.24  |
| T2949 | mTOR                                         | 0.92  | 0.91  | 0.92 | 0.91 | 1.11  | 0.88  |
| M2694 | Munc181                                      | 0.99  | 0.98  | 0.98 | 1.01 | 1.35  | 0.98  |
| M6194 | Munc13 1                                     | 1.18  | 1.19  | 1.24 | 1.22 | 1.90  | 1.32  |
| M9934 | MyD88                                        | 0.79  | 1.00  | 0.51 | 0.77 | 1.00  | 0.60  |



|       |                                       |       |       |      |      |       |       |
|-------|---------------------------------------|-------|-------|------|------|-------|-------|
| M1570 | Myosin                                | 1.17  | 1.10  | 1.14 | 1.21 | 2.33  | 1.22  |
| M3567 | Myosin Ib Nuclear                     | 0.99  | 0.94  | 0.91 | 0.93 | 1.16  | 0.88  |
| M8064 | Myosin IIA                            | 0.88  | 0.89  | 0.87 | 0.91 | 1.05  | 0.79  |
| M5566 | Myosin IX Myr5                        | 0.94  | 0.92  | 0.92 | 0.98 | 1.18  | 0.86  |
| M7905 | Myosin Light Chain Kinase             | 1.06  | 1.05  | 1.15 | 1.35 | 1.22  | 1.42  |
| M4812 | Myosin Va                             | 1.06  | 1.12  | 1.10 | 1.26 | 1.24  | 1.40  |
| M5062 | Myosin Va                             | 1.06  | 1.20  | 1.17 | 1.41 | 1.35  | 1.17  |
| M0691 | Myosin VI                             | 1.04  | 1.07  | 1.10 | 1.08 | 1.15  | 1.14  |
| M5187 | Myosin VI                             | 0.95  | 0.94  | 1.07 | 1.03 | 1.13  | 1.14  |
| N9287 | NBS1 Nibrin                           | 1.16  | 1.20  | 1.19 | 1.26 | 3.56  | 2.95  |
| N3037 | NBS1                                  | 6.66  | 17.02 | 1.00 | 3.16 | 11.08 | 3.11  |
| N3162 | NBS1                                  | 20.72 | 15.76 | 1.03 | 1.80 | 3.31  | 1.53  |
| N2911 | Nck2                                  | 1.00  | 1.02  | 0.78 | 1.02 | 0.90  | 0.93  |
| N2786 | Nedd8                                 | 1.01  | 1.01  | 0.55 | 1.15 | 2.58  | 1.84  |
| N3279 | Nerve Growth Factor b                 | 1.22  | 1.50  | 1.16 | 1.64 | 5.43  | 3.91  |
| N5408 | Nerve Growth Factor Receptor          | 1.80  | 1.97  | 1.37 | 1.30 | 2.40  | 1.59  |
| N3908 | Nerve growth factor receptor p75      | 0.89  | 0.96  | 0.96 | 0.89 | 0.97  | 0.96  |
| N4412 | Neurabin I                            | 1.02  | 0.90  | 0.94 | 0.79 | 0.95  | 1.00  |
| N5037 | Neurabin II                           | 1.35  | 1.92  | 2.21 | 2.00 | 24.59 | 16.73 |
| N5162 | NeurabinII                            | 6.60  | 2.33  | 4.08 | 3.62 | 2.85  | 2.71  |
| N3662 | Neurofibromin                         | 1.10  | 1.11  | 1.12 | 1.04 | 1.13  | 1.19  |
| N2787 | Neurofilament 160                     | 1.03  | 1.05  | 0.73 | 0.96 | 1.59  | 1.02  |
| N4142 | Neurofilament 200                     | 0.96  | 0.97  | 0.84 | 0.97 | 1.26  | 0.96  |
| N0142 | Neurofilament 200                     | 1.09  | 1.21  | 0.96 | 1.60 | 1.91  | 1.08  |
| N5389 | Neurofilament 200                     | 1.04  | 1.07  | 0.93 | 0.89 | 1.00  | 0.81  |
| N5139 | Neurofilament 68                      | 1.03  | 1.01  | 0.68 | 0.68 | 0.76  | 0.75  |
| N2912 | Neurofilament 160 200                 | 1.04  | 1.11  | 0.82 | 0.91 | 1.15  | 1.09  |
| N8523 | NFkB                                  | 1.73  | 2.24  | 5.43 | 2.77 | 39.58 | 6.47  |
| N2661 | NAK                                   | 1.11  | 1.13  | 1.00 | 1.11 | 1.66  | 1.38  |
| N8912 | NG2                                   | 1.09  | 1.18  | 1.38 | 0.87 | 3.52  | 2.04  |
| N1660 | Nicastrin                             | 1.05  | 1.06  | 1.17 | 1.03 | 1.53  | 1.01  |
| N2280 | Nitric Oxide Synthase bNOS            | 1.94  | 1.89  | 5.45 | 1.12 | 3.58  | 5.49  |
| N7155 | Nitric Oxide Synthase bNOS            | 0.96  | 0.95  | 0.97 | 1.04 | 1.22  | 0.92  |
| N9532 | Nitric Oxide Synthase Endothelial eNO | 1.08  | 1.08  | 1.12 | 1.00 | 1.19  | 1.12  |
| N3893 | Nitric Oxide Synthase Endothelial eNO | 1.04  | 1.07  | 1.19 | 1.12 | 1.97  | 1.14  |
| N2643 | Nitric Oxide Synthase Endothelial eNO | 1.03  | 1.07  | 1.04 | 0.96 | 1.33  | 0.74  |
| N7782 | Nitric Oxide Synthase Inducible iNOS  | 0.94  | 0.98  | 0.90 | 0.97 | 1.20  | 0.61  |
| N9657 | Nitric Oxide Synthase Inducible iNOS  | 1.24  | 1.26  | 0.93 | 0.95 | 2.79  | 0.83  |
| N6786 | Notch1                                | 1.32  | 1.45  | 1.43 | 0.98 | 6.62  | 1.61  |
| N0409 | Nitrotyrosin                          | 1.19  | 1.24  | 1.06 | 0.91 | 1.40  | 1.07  |
| N9527 | NTF2                                  | 1.28  | 1.40  | 1.28 | 1.02 | 4.81  | 1.26  |
| N5287 | Nuf2                                  | 2.01  | 1.44  | 1.37 | 1.38 | 5.67  | 1.26  |
| O6264 | OGlcNAc Transferase                   | 14.05 | 12.87 | 1.05 | 1.42 | 1.00  | 1.00  |
| O0138 | OP18 Stathmin                         | 1.07  | 1.08  | 1.27 | 1.07 | 1.83  | 0.59  |
| O1136 | Omithine Decarboxylase                | 1.23  | 1.18  | 1.59 | 0.99 | 4.22  | 0.96  |
| P3118 | p115 TAP                              | 1.74  | 1.51  | 1.57 | 1.06 | 6.99  | 1.34  |
| P1870 | p120ctn                               | 0.86  | 0.87  | 0.88 | 0.89 | 1.19  | 0.74  |
| C0354 | p130CAS                               | 1.12  | 1.15  | 1.42 | 1.19 | 1.50  | 0.85  |
| P2610 | p14 arf                               | 1.98  | 2.29  | 1.55 | 0.86 | 12.42 | 0.73  |
| P0968 | p16INK4a/CDKN2                        | 1.31  | 1.34  | 1.74 | 1.34 | 1.97  | 1.04  |
| P4354 | p19INK4d                              | 3.24  | 5.41  | 4.26 | 2.40 | 14.28 | 4.22  |
| P1484 | p21WAF1Cip1                           | 0.99  | 0.99  | 1.05 | 1.03 | 1.10  | 1.07  |
| P2859 | p300 CBP                              | 1.52  | 1.68  | 1.07 | 1.33 | 2.43  | 1.33  |
| C3085 | p34cdc2                               | 1.26  | 1.33  | 1.05 | 0.99 | 1.95  | 1.13  |
| P9489 | p35 Cdk5 Regulator                    | 0.92  | 0.94  | 0.96 | 0.93 | 1.21  | 0.81  |
| M8432 | p38 MAP Kinase NonActivated           | 1.88  | 1.67  | 1.45 | 1.43 | 1.56  | 1.65  |
| M0800 | p38 MAPK                              | 0.87  | 0.92  | 0.83 | 0.99 | 1.08  | 0.90  |

|       |                                       |      |      |      |      |      |      |
|-------|---------------------------------------|------|------|------|------|------|------|
| M8177 | p38 MAPK activated diphosphorylated   | 1.48 | 1.29 | 0.96 | 1.11 | 1.65 | 1.27 |
| P5813 | p53                                   | 1.04 | 1.09 | 0.97 | 0.95 | 1.23 | 1.08 |
| P6874 | P53                                   | 1.04 | 1.08 | 0.86 | 0.96 | 1.33 | 0.99 |
| P8982 | p53 pSer392                           | 1.00 | 1.00 | 0.99 | 1.00 | 1.00 | 1.00 |
| P4868 | p53DINP1SIP                           | 1.43 | 1.90 | 0.67 | 1.01 | 1.00 | 0.93 |
| P4993 | P53R2                                 | 0.37 | 1.00 | 1.00 | 0.48 | 0.25 | 0.45 |
| B4561 | P53 BP1                               | 2.68 | 3.16 | 0.95 | 1.37 | 0.59 | 2.07 |
| B4436 | P53 BP1                               | 1.62 | 1.91 | 1.05 | 1.09 | 0.93 | 1.44 |
| P2735 | p57kip2                               | 1.08 | 1.17 | 1.54 | 1.07 | 1.62 | 1.18 |
| P3362 | p63                                   | 0.93 | 0.98 | 0.94 | 0.89 | 1.01 | 0.87 |
| P3737 | p63                                   | 1.01 | 1.01 | 0.94 | 1.05 | 1.30 | 0.96 |
| P6246 | PABP                                  | 1.09 | 1.26 | 1.26 | 1.04 | 1.43 | 1.36 |
| P4749 | PAD14                                 | 1.17 | 1.20 | 1.30 | 1.13 | 1.33 | 1.07 |
| P3237 | PAK1pThr212                           | 1.02 | 1.25 | 1.26 | 0.99 | 1.38 | 0.96 |
| P5367 | Par4 Prostate Apoptosis Response 4    | 0.74 | 0.76 | 0.76 | 0.77 | 0.81 | 0.65 |
| P5746 | pParvin                               | 1.17 | 1.10 | 1.04 | 1.13 | 1.21 | 1.56 |
| P6248 | Parkin                                | 0.89 | 0.84 | 0.88 | 0.94 | 1.17 | 0.84 |
| P7605 | PARP                                  | 1.02 | 1.01 | 1.00 | 0.97 | 0.99 | 1.00 |
| P1093 | Paxillin                              | 1.34 | 1.34 | 1.11 | 1.13 | 1.23 | 1.35 |
| P7493 | PCAF                                  | 1.03 | 1.07 | 1.03 | 0.94 | 1.05 | 1.02 |
| P8825 | Proliferating Cell Nuclear Antigen    | 1.34 | 1.45 | 1.15 | 0.95 | 1.68 | 1.74 |
| P3110 | PDK1                                  | 1.10 | 1.07 | 1.04 | 1.04 | 1.08 | 1.05 |
| P5622 | Pen2                                  | 1.26 | 1.23 | 1.18 | 1.16 | 1.32 | 1.15 |
| P5117 | Peripherin                            | 1.01 | 1.01 | 0.98 | 1.01 | 1.04 | 1.00 |
| P1247 | Peroxiredoxin 3                       | 1.07 | 1.07 | 1.08 | 1.08 | 1.11 | 1.04 |
| P5243 | PERP                                  | 0.26 | 0.32 | 0.31 | 0.40 | 0.30 | 0.24 |
| P5242 | Phospholipase A2 group v              | 1.01 | 1.02 | 0.97 | 0.99 | 1.00 | 1.00 |
| P5747 | Phosphoserine                         | 0.99 | 1.02 | 0.91 | 0.93 | 1.04 | 0.95 |
| P6623 | Phosphothreonine                      | 1.12 | 1.19 | 1.21 | 1.07 | 1.37 | 1.14 |
| P1869 | Phosphotyrosine                       | 1.07 | 1.12 | 1.02 | 1.01 | 1.08 | 1.09 |
| P8104 | Phospholipase C g1                    | 0.77 | 0.82 | 0.76 | 0.79 | 0.74 | 0.71 |
| P1495 | Phosphatidyserine Receptor            | 0.74 | 0.76 | 0.67 | 0.76 | 0.73 | 0.61 |
| P9498 | PIASx                                 | 1.18 | 1.15 | 1.05 | 1.03 | 1.15 | 1.13 |
| P9371 | PINCH1                                | 1.03 | 1.09 | 1.10 | 1.03 | 1.16 | 0.96 |
| P2482 | Protein Kinase Ba                     | 1.17 | 1.24 | 1.20 | 1.12 | 1.36 | 1.05 |
| P1601 | Protein Kinase Ba                     | 0.80 | 0.78 | 0.78 | 0.79 | 0.77 | 0.68 |
| P4112 | PKB pSer473                           | 0.85 | 0.86 | 1.06 | 1.91 | 1.27 | 2.13 |
| P3862 | PKB pThr308                           | 1.03 | 0.99 | 1.43 | 1.12 | 1.24 | 1.06 |
| P5704 | Protein Kinase C PKC                  | 1.01 | 1.11 | 1.25 | 1.29 | 1.51 | 1.76 |
| P4334 | Protein Kinase C Ca                   | 0.91 | 0.95 | 1.04 | 0.93 | 1.04 | 0.91 |
| P3078 | Protein Kinase C b1                   | 0.64 | 0.64 | 0.78 | 0.67 | 0.73 | 0.66 |
| P6959 | Protein Kinase C b1                   | 1.50 | 1.53 | 1.20 | 1.15 | 1.31 | 1.16 |
| P3203 | Protein Kinase C b2                   | 0.59 | 0.65 | 0.64 | 0.64 | 0.68 | 0.50 |
| P2584 | Protein Kinase C b2                   | 0.69 | 0.72 | 0.67 | 0.63 | 0.67 | 0.64 |
| P8083 | Protein Kinase Cg                     | 0.79 | 0.91 | 0.82 | 0.58 | 0.81 | 0.51 |
| P8333 | Protein Kinase C d                    | 0.76 | 0.80 | 0.83 | 0.81 | 0.80 | 0.73 |
| P8458 | Protein Kinase C e                    | 0.82 | 0.83 | 0.87 | 0.89 | 0.83 | 0.86 |
| P0713 | Protein Kinase C                      | 0.83 | 0.86 | 0.85 | 0.93 | 0.86 | 0.88 |
| P8090 | Protein Kinase C                      | 0.78 | 0.83 | 0.81 | 0.84 | 0.77 | 0.80 |
| P3987 | Protein Kinase D                      | 0.80 | 0.82 | 0.74 | 0.95 | 0.73 | 0.92 |
| P0244 | PKR                                   | 0.76 | 0.78 | 0.75 | 0.89 | 0.77 | 0.80 |
| P8087 | Plakoglobin Catenin g                 | 0.62 | 0.65 | 0.63 | 0.71 | 0.51 | 0.52 |
| P7679 | Platelet-Derived Growth Factor Recept | 0.28 | 0.37 | 0.40 | 0.41 | 0.15 | 0.14 |
| P9318 | Plectin                               | 0.87 | 0.88 | 0.79 | 0.69 | 0.80 | 0.63 |
| P6746 | PML                                   | 0.88 | 0.91 | 0.79 | 0.69 | 0.77 | 0.66 |
| P7854 | Presenilin1                           | 0.80 | 0.84 | 0.79 | 0.78 | 0.79 | 0.67 |
| P5999 | Prion Protein                         | 0.63 | 0.76 | 0.59 | 0.45 | 0.59 | 0.22 |

|       |                                      |      |      |      |      |      |      |
|-------|--------------------------------------|------|------|------|------|------|------|
| P6871 | PRMT1                                | 0.60 | 0.76 | 0.54 | 0.48 | 0.51 | 0.30 |
| P6996 | PRMT1                                | 0.72 | 0.82 | 0.67 | 0.66 | 0.65 | 0.36 |
| P0748 | PRMT2                                | 0.68 | 0.87 | 0.98 | 2.55 | 1.38 | 6.39 |
| P9370 | PRMT3                                | 1.06 | 0.94 | 1.11 | 1.62 | 2.01 | 3.36 |
| P4995 | PRMT4                                | 1.15 | 1.22 | 1.19 | 1.20 | 1.18 | 1.33 |
| P0493 | PRMT5                                | 1.53 | 1.61 | 1.80 | 1.57 | 1.91 | 1.84 |
| P6495 | PRMT6                                | 0.98 | 1.00 | 0.92 | 0.80 | 0.92 | 0.76 |
| P2996 | PRMT6                                | 1.07 | 0.99 | 0.84 | 1.17 | 1.06 | 1.41 |
| P6834 | Proliferating Cell Protein Ki67      | 1.21 | 1.20 | 1.31 | 1.26 | 1.34 | 1.22 |
| P7979 | Protein phosphatase 1a               | 1.26 | 1.26 | 1.30 | 1.32 | 1.27 | 1.09 |
| P7607 | Protein Phosphatase 1a               | 1.01 | 0.98 | 0.96 | 1.04 | 0.97 | 0.99 |
| P8998 | Protein Phosphatase 2Aa              | 1.01 | 1.00 | 0.79 | 0.82 | 0.82 | 0.91 |
| P4555 | Protein S                            | 1.15 | 1.10 | 1.14 | 1.26 | 1.20 | 1.28 |
| P9109 | Protein Tyrosine Phosphatase PEST    | 1.05 | 1.08 | 1.25 | 1.25 | 0.96 | 0.95 |
| P2860 | PSF                                  | 1.03 | 1.02 | 0.72 | 0.80 | 0.79 | 0.85 |
| P7482 | PTEN                                 | 0.92 | 0.90 | 0.94 | 1.07 | 0.98 | 1.04 |
| P3487 | PTEN                                 | 0.96 | 0.96 | 1.01 | 0.99 | 1.01 | 1.14 |
| P4618 | PUMA bbc3                            | 0.26 | 0.35 | 0.48 | 0.63 | 0.43 | 0.36 |
| P4743 | PUMA bbc3                            | 0.21 | 0.27 | 0.27 | 0.37 | 0.34 | 0.26 |
| P3902 | Pyk2                                 | 0.92 | 0.92 | 0.74 | 0.82 | 0.77 | 0.75 |
| A9856 | AP2 beta                             | 0.90 | 0.80 | 0.62 | 1.00 | 0.87 | 1.32 |
| P6989 | Pyk2 Phospho pTyr579 580             | 1.00 | 1.32 | 2.21 | 1.84 | 0.85 | 1.00 |
| A9981 | AP2 alpha                            | 0.66 | 0.63 | 0.51 | 0.61 | 0.51 | 0.43 |
| A3108 | AP2 gamma                            | 0.74 | 0.77 | 0.46 | 0.76 | 0.47 | 0.57 |
| R7904 | Rab5                                 | 0.91 | 0.90 | 0.61 | 1.02 | 0.61 | 0.91 |
| R8779 | Rab7                                 | 1.52 | 1.30 | 1.90 | 2.94 | 1.10 | 2.71 |
| R5404 | Rab9                                 | 0.86 | 0.90 | 0.87 | 0.96 | 0.68 | 1.04 |
| R5029 | RAD1                                 | 1.00 | 1.03 | 1.04 | 0.93 | 0.95 | 0.70 |
| R8029 | Rad17                                | 0.95 | 0.82 | 0.63 | 0.83 | 0.34 | 0.47 |
| R2404 | Raf1cRaf                             | 1.96 | 1.65 | 1.47 | 1.10 | 0.88 | 1.10 |
| R5773 | Raf1                                 | 0.82 | 0.86 | 0.93 | 0.94 | 1.02 | 0.84 |
| R1151 | cRaf pSer621                         | 0.31 | 0.39 | 0.49 | 0.52 | 0.45 | 0.35 |
| R9775 | RAIDD                                | 0.16 | 0.32 | 0.24 | 0.40 | 0.18 | 0.18 |
| R5275 | RAIDD                                | 1.00 | 1.00 | 1.00 | 0.63 | 0.34 | 1.27 |
| R8529 | RALAR                                | 0.94 | 0.89 | 0.95 | 0.66 | 0.91 | 0.64 |
| R4777 | Ran                                  | 1.05 | 0.96 | 1.06 | 0.80 | 0.83 | 0.67 |
| P0104 | PIASy                                | 0.97 | 0.84 | 1.07 | 0.76 | 1.02 | 0.67 |
| R8154 | RAP1                                 | 1.35 | 1.49 | 1.10 | 0.94 | 0.78 | 0.89 |
| R3779 | RbAp48 RbAp46                        | 1.09 | 1.12 | 0.93 | 0.97 | 0.69 | 0.81 |
| R4904 | Reelin                               | 0.95 | 0.94 | 0.87 | 0.91 | 0.80 | 0.93 |
| R6775 | Retinoblastoma                       | 0.77 | 0.79 | 0.85 | 0.92 | 0.68 | 0.87 |
| R6878 | Retinoblastoma pSer795               | 2.95 | 1.77 | 1.25 | 0.98 | 0.62 | 0.58 |
| R6153 | RhoE                                 | 1.90 | 1.85 | 1.10 | 0.99 | 0.69 | 0.78 |
| R9650 | RICK                                 | 0.30 | 0.37 | 0.79 | 0.47 | 0.30 | 0.29 |
| R8274 | RIP Receptor Interacting Protein     | 1.11 | 1.07 | 1.07 | 0.91 | 0.97 | 1.00 |
| R3529 | RNaseL                               | 1.95 | 1.98 | 3.36 | 1.57 | 1.32 | 1.39 |
| R6028 | ROCK1                                | 1.04 | 1.12 | 1.01 | 0.85 | 0.92 | 0.65 |
| R8653 | ROCK2                                | 1.41 | 1.20 | 0.97 | 0.88 | 0.81 | 0.72 |
| R5145 | Rsk1                                 | 0.90 | 0.93 | 0.88 | 0.97 | 0.86 | 0.91 |
| S2644 | S100                                 | 0.87 | 0.86 | 0.74 | 0.92 | 0.70 | 0.84 |
| S2407 | S100 aSubunit                        | 1.03 | 1.04 | 0.75 | 1.01 | 0.59 | 1.09 |
| S2532 | S100 bSubunit                        | 1.24 | 1.24 | 0.81 | 1.14 | 0.74 | 1.28 |
| N5411 | S Nitrosocysteine                    | 0.81 | 0.84 | 0.73 | 0.89 | 0.70 | 0.77 |
| S4047 | S6 Kinase                            | 0.92 | 0.95 | 0.98 | 0.97 | 0.95 | 0.90 |
| S0315 | SAPK3                                | 3.24 | 1.10 | 1.41 | 1.02 | 0.51 | 1.15 |
| S3396 | Spectrin a and b                     | 1.18 | 1.15 | 0.82 | 0.94 | 0.63 | 0.92 |
| P8109 | Serine Threonine Protein Phosphatase | 0.98 | 0.98 | 0.98 | 0.84 | 0.91 | 0.96 |

|       |                                      |      |      |      |      |      |      |
|-------|--------------------------------------|------|------|------|------|------|------|
| P7484 | Serine Threonine Protein Phosphatase | 0.91 | 0.94 | 0.94 | 0.77 | 0.79 | 0.88 |
| P7609 | Serine Threonine Protein Phosphatase | 0.99 | 0.98 | 0.98 | 0.80 | 0.83 | 0.96 |
| P5359 | Serine Threonine Protein Phosphatase | 1.02 | 0.99 | 0.88 | 0.79 | 0.71 | 0.95 |
| P8359 | SerineThreonine Protein Phosphatase  | 0.77 | 0.81 | 0.42 | 0.73 | 0.33 | 0.78 |
| P8609 | Serine Threonine Protein Phosphatase | 1.03 | 1.01 | 0.74 | 0.93 | 0.65 | 1.02 |
| S5188 | SGK                                  | 1.01 | 0.98 | 0.68 | 1.01 | 0.63 | 0.94 |
| S3056 | SHPTP2                               | 0.78 | 0.80 | 0.71 | 0.87 | 0.64 | 0.76 |
| S7945 | Siah2                                | 0.90 | 0.80 | 0.54 | 0.84 | 0.40 | 0.69 |
| S4445 | Sin3A                                | 0.99 | 0.97 | 0.84 | 1.03 | 0.70 | 0.92 |
| S6695 | Sin3A                                | 1.07 | 1.07 | 0.99 | 0.94 | 0.70 | 1.00 |
| S5313 | Sir2                                 | 0.65 | 0.68 | 0.71 | 0.72 | 0.59 | 0.54 |
| S1311 | SIRPa1                               | 0.57 | 0.50 | 1.91 | 0.71 | 0.50 | 0.46 |
| S5196 | Sirt1                                | 1.03 | 1.01 | 1.13 | 0.98 | 0.95 | 0.93 |
| S9568 | SKM1                                 | 0.95 | 0.94 | 0.79 | 0.94 | 0.74 | 0.94 |
| T8578 | Beta tubulin III (neuronal)          | 0.76 | 0.80 | 0.67 | 0.90 | 0.65 | 0.76 |
| S1190 | SLIPR MAGI3                          | 0.97 | 0.98 | 0.93 | 0.98 | 0.93 | 1.00 |
| S4191 | SLIPR MAGI3                          | 0.80 | 0.85 | 0.76 | 0.84 | 0.73 | 0.81 |
| S3934 | Smad4                                | 1.00 | 1.04 | 1.04 | 0.99 | 1.04 | 1.05 |
| S6446 | SMC1L1                               | 0.98 | 1.02 | 0.97 | 1.02 | 0.93 | 0.91 |
| S2944 | SMN                                  | 0.88 | 0.93 | 0.78 | 0.95 | 0.74 | 0.82 |
| S9444 | a b SNAP                             | 0.85 | 0.88 | 0.88 | 0.95 | 0.88 | 0.87 |
| S2194 | SNAP23                               | 0.83 | 0.87 | 0.84 | 0.89 | 0.83 | 0.77 |
| S9684 | SNAP25                               | 0.83 | 0.87 | 0.84 | 0.89 | 0.84 | 0.79 |
| S2069 | SNAP29                               | 0.89 | 0.92 | 0.83 | 0.98 | 0.86 | 0.88 |
| S2937 | Sos1                                 | 0.84 | 0.86 | 0.84 | 0.94 | 0.84 | 0.84 |
| S9809 | Sp1                                  | 0.87 | 0.92 | 0.78 | 0.92 | 0.77 | 0.86 |
| S7320 | Spred2                               | 0.83 | 0.86 | 0.68 | 0.82 | 0.66 | 0.88 |
| S0696 | Striatin                             | 0.59 | 0.66 | 0.58 | 0.81 | 0.54 | 0.58 |
| S8305 | Substance P Receptor                 | 0.78 | 0.81 | 0.83 | 0.90 | 0.79 | 0.79 |
| S0941 | SMAC Diabolo                         | 0.72 | 0.75 | 0.68 | 0.74 | 0.70 | 0.62 |
| S8070 | SUMO1                                | 0.66 | 0.76 | 0.51 | 0.80 | 0.47 | 0.59 |
| S5446 | SUMO1                                | 0.85 | 0.88 | 0.82 | 0.89 | 0.81 | 0.80 |
| S8191 | Survivin                             | 0.70 | 0.72 | 0.63 | 0.77 | 0.65 | 0.62 |
| S2177 | Synaptotagmin                        | 0.84 | 0.86 | 0.63 | 0.83 | 0.64 | 0.68 |
| S9442 | Synaptopodin                         | 0.82 | 0.88 | 0.70 | 0.84 | 0.66 | 0.71 |
| S9567 | Synaptopodin                         | 0.77 | 0.82 | 0.62 | 0.86 | 0.63 | 0.68 |
| S4945 | SynCAM                               | 0.39 | 0.48 | 0.49 | 2.38 | 0.69 | 1.93 |
| S4688 | a1Syntrophin                         | 0.88 | 0.86 | 0.93 | 1.16 | 0.88 | 1.15 |
| S4813 | a1 Syntrophin                        | 0.85 | 0.84 | 0.91 | 1.11 | 0.86 | 0.89 |
| S0664 | Syntaxin                             | 0.91 | 0.86 | 0.95 | 1.04 | 0.88 | 1.19 |
| S9067 | Syntaxin 6                           | 0.87 | 0.64 | 0.60 | 0.81 | 0.55 | 0.88 |
| S8945 | Syntaxin 8                           | 0.53 | 0.58 | 0.60 | 0.99 | 0.57 | 0.44 |
| S3062 | aSynuclein                           | 0.73 | 0.72 | 0.78 | 0.88 | 0.73 | 0.72 |
| T1075 | Tal                                  | 0.63 | 0.51 | 0.63 | 0.75 | 0.59 | 0.69 |
| T1200 | Tal                                  | 0.53 | 0.63 | 0.53 | 0.69 | 0.51 | 0.48 |
| T1076 | TAP                                  | 0.75 | 0.71 | 0.57 | 0.80 | 0.64 | 0.55 |
| T9450 | Tau                                  | 0.70 | 0.66 | 0.50 | 0.71 | 0.42 | 0.58 |
| T6819 | Tau pSer199 202                      | 0.60 | 0.66 | 0.44 | 0.78 | 0.38 | 0.46 |
| T5530 | Tau                                  | 0.63 | 0.60 | 0.51 | 0.73 | 0.46 | 0.51 |
| T2551 | Tenascin                             | 0.73 | 0.71 | 0.76 | 0.85 | 0.59 | 0.74 |
| T7076 | Thimet Oligopeptidase 1              | 0.80 | 0.74 | 0.69 | 0.80 | 0.68 | 0.87 |
| T2576 | TIS7                                 | 0.57 | 0.60 | 0.45 | 0.70 | 0.45 | 0.44 |
| T1815 | Tumor Necrosis Factor Soluble Recept | 0.38 | 0.42 | 0.34 | 0.69 | 0.29 | 0.41 |
| T2948 | Tob                                  | 0.75 | 0.68 | 0.57 | 0.82 | 0.50 | 0.60 |
| T6319 | TOM22                                | 0.87 | 0.83 | 0.83 | 0.86 | 0.74 | 0.79 |
| T8573 | Topoisomerasel                       | 0.55 | 0.54 | 0.50 | 0.69 | 0.45 | 0.51 |
| T3067 | TRAIL                                | 0.37 | 0.39 | 0.37 | 0.55 | 0.30 | 0.26 |

|       |                                       |      |      |      |      |      |      |
|-------|---------------------------------------|------|------|------|------|------|------|
| T9191 | TRAIL                                 | 0.40 | 0.41 | 0.41 | 0.60 | 0.33 | 0.35 |
| T9429 | Transforming Growth Factorb pan       | 0.79 | 0.73 | 1.10 | 3.36 | 0.73 | 4.51 |
| T0825 | Transformin 1                         | 1.00 | 1.02 | 1.10 | 1.04 | 1.05 | 1.14 |
| T1948 | TRF1                                  | 1.07 | 1.09 | 1.22 | 1.08 | 1.00 | 1.23 |
| T2780 | Tropomyosin                           | 0.93 | 0.90 | 1.02 | 0.71 | 0.78 | 0.88 |
| T9283 | Tropomyosin                           | 0.68 | 0.70 | 0.88 | 0.80 | 0.63 | 1.25 |
| T0678 | Tryptophane Hydroxylase               | 0.81 | 0.79 | 1.09 | 1.03 | 0.75 | 1.45 |
| T5826 | TSG101                                | 0.82 | 0.89 | 1.79 | 1.10 | 0.78 | 0.98 |
| T6074 | aTubulin                              | 1.09 | 1.03 | 1.07 | 0.94 | 0.84 | 1.07 |
| T6199 | aTubulin                              | 0.92 | 0.93 | 0.93 | 1.04 | 0.83 | 1.07 |
| T5201 | bTubulin                              | 0.81 | 0.82 | 0.94 | 1.09 | 0.68 | 1.25 |
| T7816 | bTubulin I                            | 1.05 | 0.99 | 1.13 | 1.22 | 0.93 | 1.19 |
| T8535 | bTubulin II                           | 1.06 | 1.05 | 1.50 | 0.97 | 0.72 | 0.93 |
| T5076 | bTubulin III                          | 1.12 | 1.09 | 1.08 | 1.10 | 0.94 | 1.22 |
| T7941 | bTubulin IV                           | 1.04 | 1.02 | 1.11 | 1.05 | 1.02 | 1.16 |
| T5326 | gTubulin                              | 0.84 | 0.79 | 1.15 | 1.15 | 0.76 | 1.25 |
| T3559 | gTubulin                              | 0.87 | 0.89 | 0.97 | 0.97 | 0.83 | 0.86 |
| T3320 | gTubulin                              | 0.95 | 0.92 | 0.95 | 1.08 | 0.82 | 1.10 |
| T1323 | e Tubulin                             | 0.80 | 0.78 | 0.88 | 1.07 | 0.70 | 1.13 |
| T9822 | Tubulin Polyglutamylated              | 0.89 | 0.90 | 1.01 | 1.01 | 0.76 | 1.22 |
| T9028 | Tubulin Tyrosine                      | 1.07 | 1.09 | 1.04 | 0.95 | 0.93 | 1.04 |
| T8300 | Tumor Necrosis Factor a               | 0.62 | 0.63 | 0.71 | 0.80 | 0.67 | 0.69 |
| T2824 | Tumor Necrosis Factor a               | 0.59 | 0.62 | 0.64 | 0.86 | 0.58 | 0.68 |
| N3038 | Nanog                                 | 0.88 | 0.85 | 1.01 | 0.97 | 0.78 | 1.05 |
| T9700 | TWEAK Receptor                        | 0.74 | 0.73 | 0.75 | 2.67 | 0.65 | 2.91 |
| T2928 | Tyrosin hydroxylase                   | 1.19 | 1.18 | 1.12 | 1.17 | 1.09 | 1.34 |
| U4758 | U2AF65                                | 0.73 | 0.72 | 0.98 | 0.73 | 0.74 | 0.79 |
| U0508 | Ubiquitin                             | 0.99 | 0.95 | 1.01 | 1.01 | 0.97 | 0.92 |
| U5133 | Ubiquitin C terminal Hydrolase L1     | 0.87 | 0.87 | 0.86 | 0.93 | 0.73 | 0.91 |
| U5258 | Ubiquitin Cterminal Hydrolase L1      | 0.78 | 0.77 | 0.84 | 0.78 | 0.71 | 0.70 |
| P0084 | Pinin                                 | 0.80 | 0.78 | 0.86 | 0.70 | 0.61 | 0.76 |
| V2764 | Vanilloid Receptor1                   | 0.96 | 0.95 | 0.90 | 1.02 | 0.90 | 0.98 |
| V2139 | VDAC Porin                            | 0.78 | 0.77 | 0.66 | 0.74 | 0.57 | 0.68 |
| V4762 | Vascular Endothelial Growth Factor Re | 1.05 | 0.98 | 1.01 | 0.87 | 0.89 | 1.04 |
| V5764 | Vesicular GABA Transporter            | 0.87 | 0.85 | 0.98 | 0.82 | 0.76 | 0.83 |
| V0389 | VGLUT1                                | 0.88 | 0.84 | 1.06 | 0.83 | 0.93 | 0.83 |
| V2639 | VGLUT 2                               | 0.98 | 0.93 | 0.85 | 1.09 | 0.74 | 0.93 |
| V6389 | Vimentin                              | 0.72 | 0.72 | 0.98 | 0.80 | 0.57 | 0.84 |
| V4505 | Vinculin                              | 0.70 | 0.67 | 0.80 | 0.62 | 0.57 | 0.64 |
| V7881 | Vitronectin                           | 1.06 | 1.04 | 1.09 | 0.99 | 1.00 | 1.10 |
| W0392 | WAVE                                  | 0.78 | 0.70 | 1.11 | 0.68 | 0.53 | 0.52 |
| W3516 | WSTF                                  | 0.77 | 0.75 | 0.82 | 0.74 | 0.54 | 0.61 |
| Y1253 | Y14                                   | 0.86 | 0.86 | 0.89 | 0.72 | 0.60 | 0.70 |
| Z0627 | ZAP70                                 | 0.94 | 0.92 | 1.23 | 0.82 | 0.70 | 0.75 |
| Z0134 | Zip Kinase                            | 0.39 | 0.44 | 0.63 | 0.50 | 0.46 | 0.36 |
| Z0377 | Zyxin                                 | 0.93 | 0.86 | 1.37 | 0.86 | 0.79 | 0.82 |

Net intensity ratio indicates a ratio of intensity (means) in an irradiated sample to that in a control sample
